# Supplementary material for: The catalytic mechanism of KI and the co-catalytic mechanism of hydroxyl substances for cycloaddition of CO2 with propylene oxide
Source: Royal Society of Chemistry journal article supplement (doi:10.1039/c2gc35711a), 2012-01-01
Supplement: c2gc35711a.pdf [file c2gc35711a.pdf]

Supporting Information for:

## The catalytic mechanism of KI and the co-catalytic mechanism of hydroxyl substances for cycloaddition of CO<sub>2</sub> with propylene oxide

*Jun Ma, Jinli Liu, Zhaofu Zhang, Buxing Han\**

Beijing National Laboratory for Molecular Sciences, Institute of Chemistry, Chinese Academy of Sciences, Beijing 100190, PR China; E-mail: [Hanbx@iccas.ac.cn](mailto:Hanbx@iccas.ac.cn)

### Contents

|                                                                                                                                                    |    |
|----------------------------------------------------------------------------------------------------------------------------------------------------|----|
| <b>Figure S1.</b> Optimized geometries of the structures of the cycloaddition without catalyst (Path 1).....                                       | 3  |
| <b>Figure S2.</b> Optimized geometries of the structures of the cycloaddition, in the presence of KI (Path 2).....                                 | 4  |
| <b>Figure S3.</b> Optimized geometries of the structures of the cycloaddition, in the presence of KI (Path 3).....                                 | 5  |
| <b>Figure S4.</b> Optimized geometries of the structures of the cycloaddition, in the presence of KI (Path 4).....                                 | 6  |
| <b>Figure S5.</b> Optimized geometries of the transition states of Paths 5, 6, 7, 8, 9 and 10.....                                                 | 7  |
| <b>Table S1.</b> Potential energy of the pathways of cycloaddition of CO <sub>2</sub> in the presence of glycerol or PG.....                       | 8  |
| <b>Figure S6.</b> Optimized geometries of the structures of the cycloaddition, in the presence of KI/glycerol (Path 11).....                       | 9  |
| <b>Figure S7.</b> Optimized geometries of the structures of the cycloaddition, in the presence of KI/Glycerol (Path 12).....                       | 11 |
| <b>Scheme S1.</b> The co-catalytic mechanism of PG with KI as catalyst for cycloaddition of CO <sub>2</sub> with PO (Path 13).....                 | 13 |
| <b>Figure S8.</b> Optimized geometries of the transition state of Path 13.....                                                                     | 14 |
| <b>Figure S9.</b> Potential energy curve of the pathway of cycloaddition of CO <sub>2</sub> with PO in the presence of KI/PG.....                  | 14 |
| <b>Figure S10.</b> Optimized geometries of the structures of the cycloaddition, in the presence of KI/PG (Path 13).....                            | 15 |
| <b>Figure S11.</b> Optimized geometry of transition state of the non-catalyzed cycloaddition of CO <sub>2</sub> by taking into of solvent effect.. | 16 |
| <b>Figure S12.</b> Optimized geometries of the transition state of Path 17 and Path 18.....                                                        | 16 |
| <b>Table S2.</b> Potential energy and relative energies of the structures of non-catalyzed cycloaddition of CO <sub>2</sub> with PO.....           | 17 |

|                                                                                                                                                      |    |
|------------------------------------------------------------------------------------------------------------------------------------------------------|----|
| <b>Table S3.</b> Potential energy and relative energies of the structures of KI catalyzed cycloaddition of CO <sub>2</sub> with PO.....              | 17 |
| <b>Table S4.</b> Potential energy and relative energies of the structures of the cycloaddition in the presence of glycerol (and PG)...               | 18 |
| <b>Table S5.</b> Potential energy and relative energies of the structures of KI catalyzed the cycloaddition with solvent effects.....                | 18 |
| <b>Table S6.</b> Potential energy and relative energies of the structures of non-catalyzed cycloaddition with solvent effects.....                   | 19 |
| <b>Table S7.</b> Potential energy and relative energies of the structures of KI/Glycerol and KI/PG catalyzed cycloaddition with solvent effects..... | 19 |
| <b>Complete Reference 17.</b> .....                                                                                                                  | 20 |
| The cartesian coordinates of the optimized geometries of the transition states.....                                                                  | 21 |

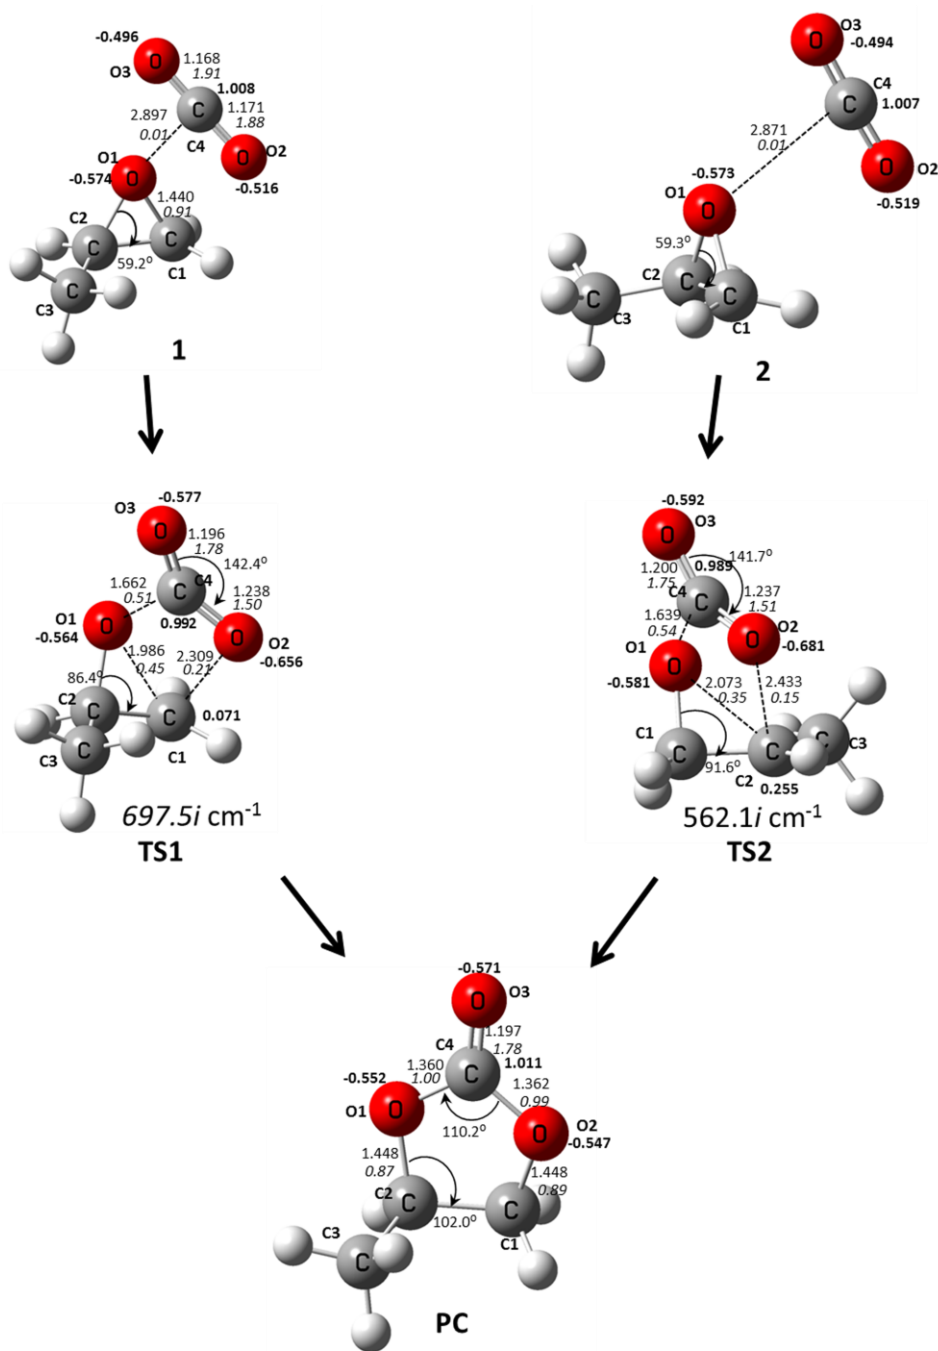

**Figure S1.** Optimized geometries of the reactants, transition states and PC of the cycloaddition of CO<sub>2</sub> with PO without catalyst (Path 1). The bond distances (in angstroms), bond orders (italic), angles (in degrees) and atomic charges (bold) are labeled in the corresponding positions. For TS1 and TS2, the imaginary vibrational frequencies (cm<sup>-1</sup>) are shown (in the bracket).

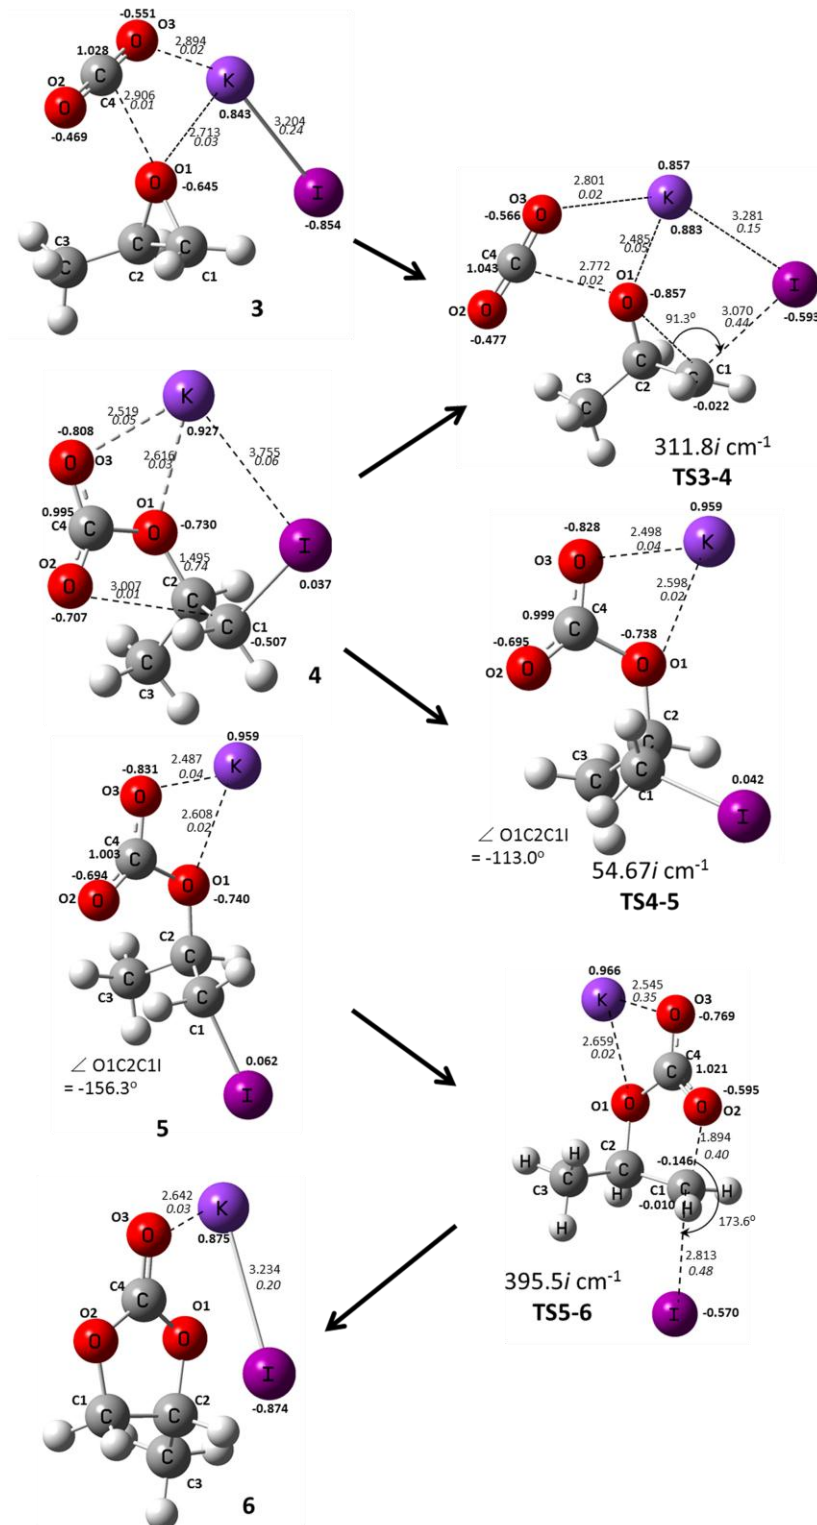

**Figure S2.** Optimized geometries of the reactants, intermediates, transition states and products of Path 2 of cycloaddition of CO<sub>2</sub> in the presence of KI. The bond distances (in angstroms), bond orders (italic), angles (in degrees) and atomic charges (bold) are labeled in the corresponding positions. For TS1 and TS2, the imaginary vibrational frequencies (cm<sup>-1</sup>) are shown (in the bracket).

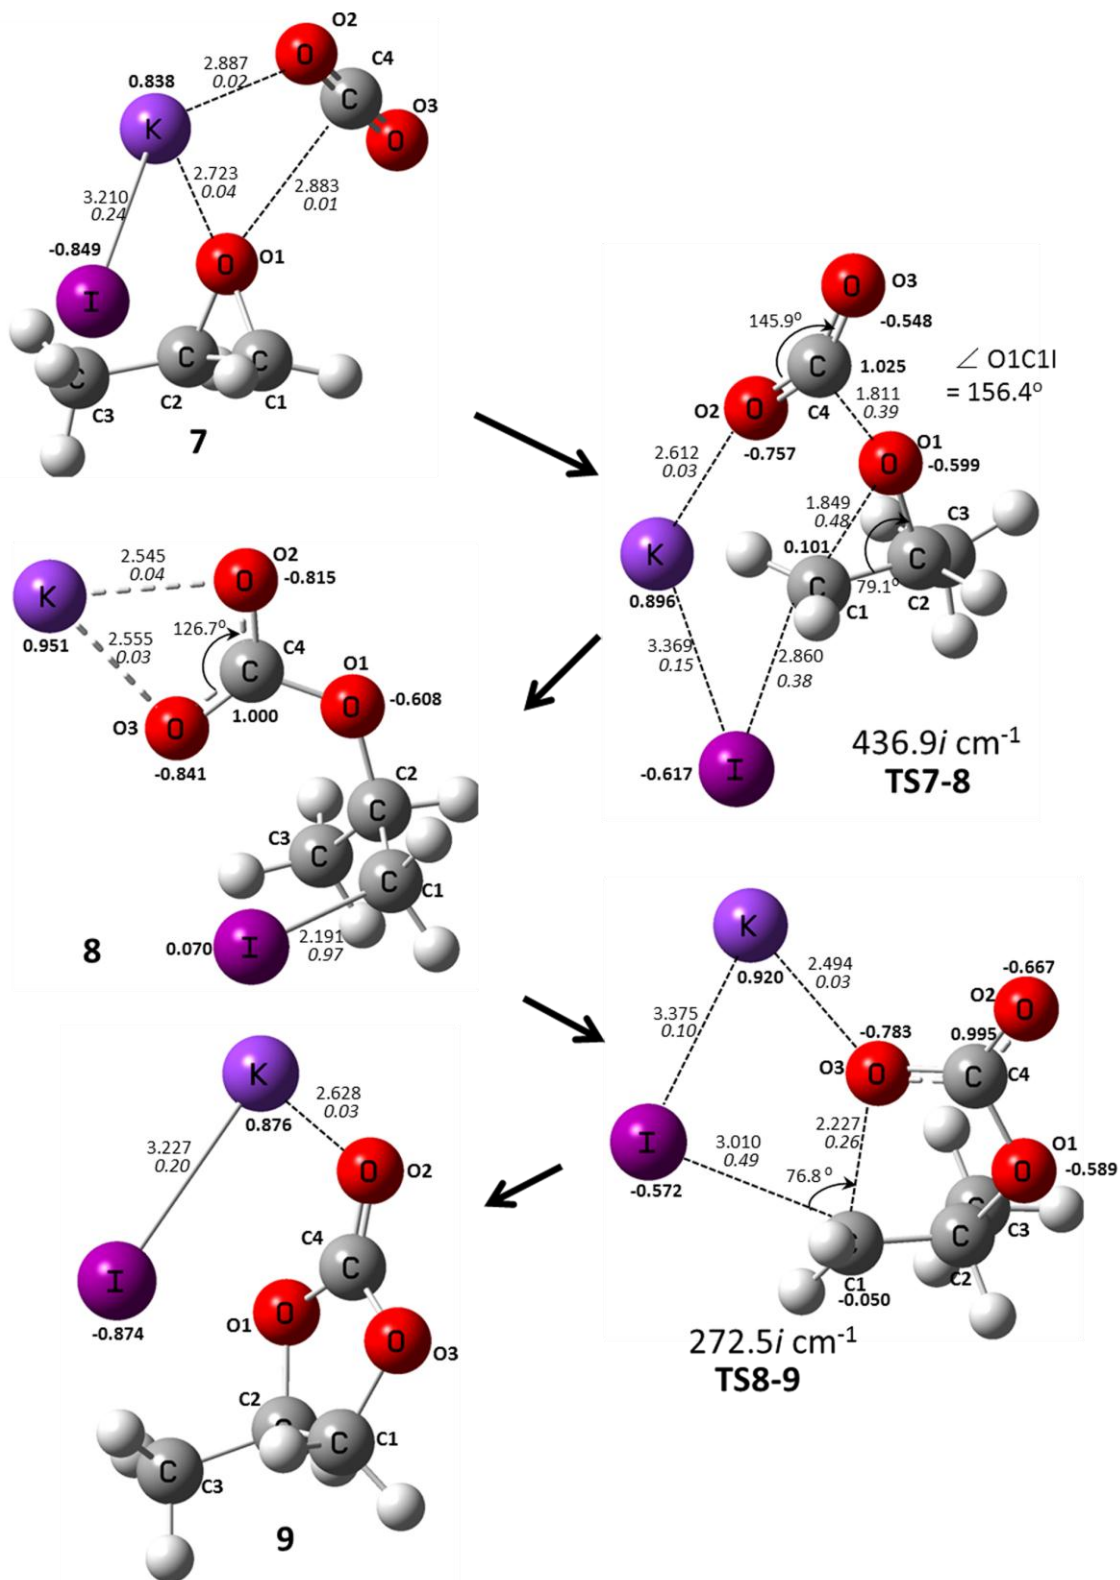

**Figure S3.** Optimized geometries of the reactants, intermediates, transition states and products of Path 3 of cycloaddition of  $\text{CO}_2$  in the presence of KI. For TSN-m, the imaginary vibrational frequencies ( $\text{cm}^{-1}$ ) are shown (in the bracket).

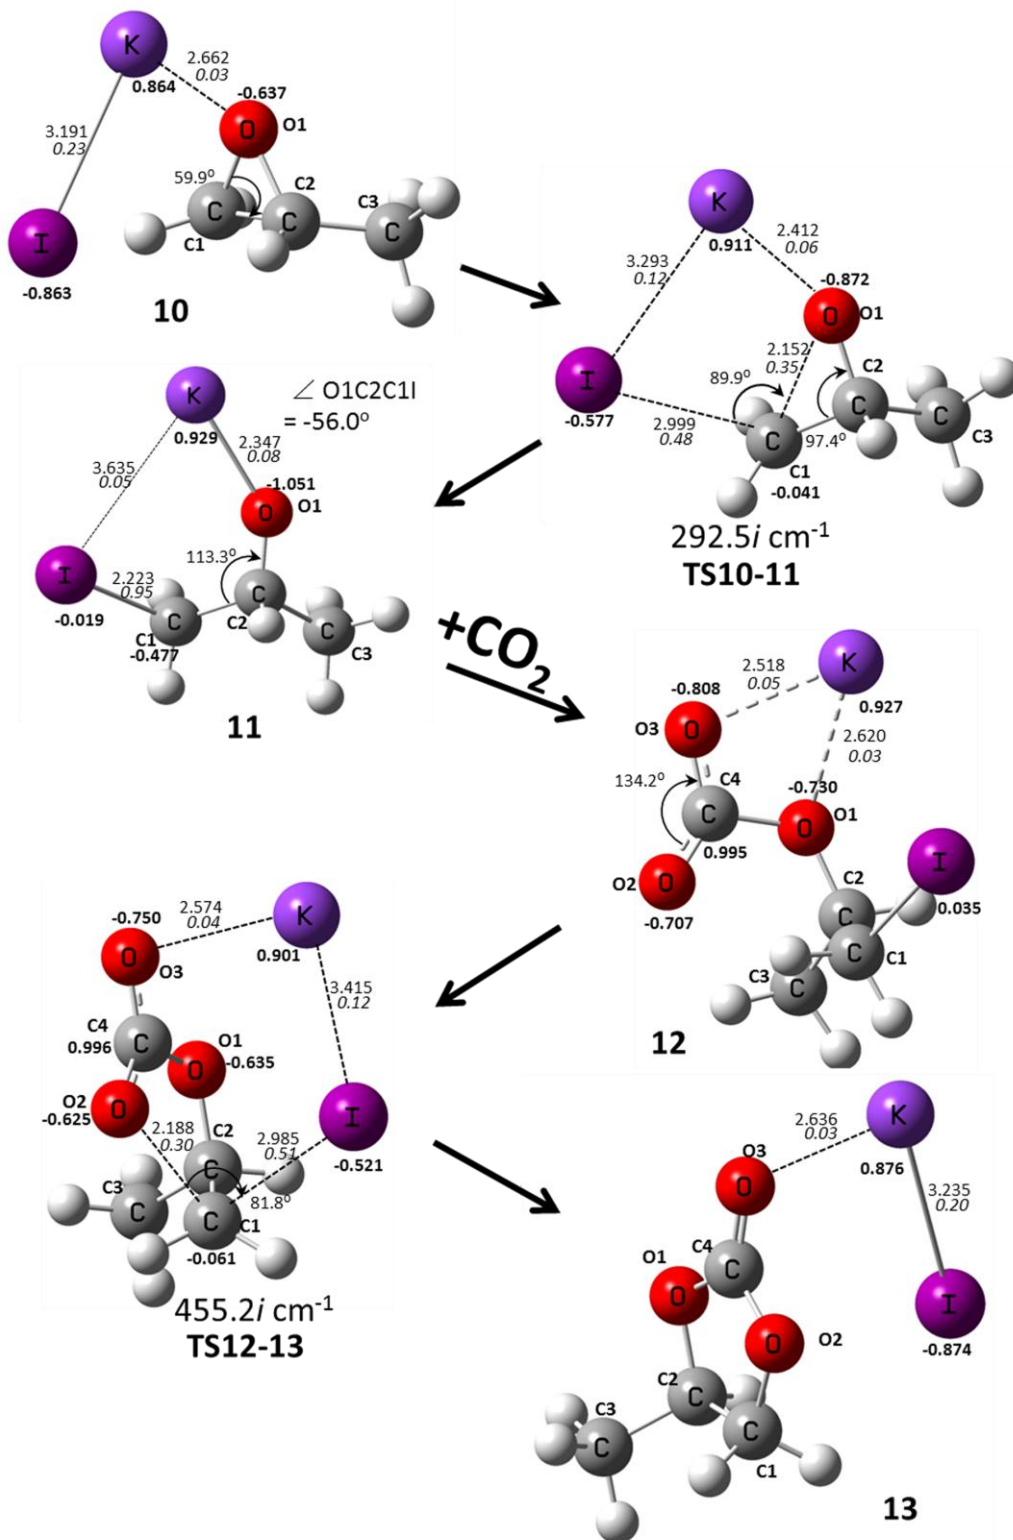

**Figure S4.** Optimized geometries of the reactants, intermediates, transition states and products in Path 4 of cycloaddition of CO<sub>2</sub> in the presence of KI. The bond distances (in angstroms), bond orders (italic), angles (in degrees) and atomic charges (bold) are labeled in the corresponding positions. For TS<sub>n</sub>-m, the imaginary vibrational frequencies (cm<sup>-1</sup>) are shown (in the bracket).

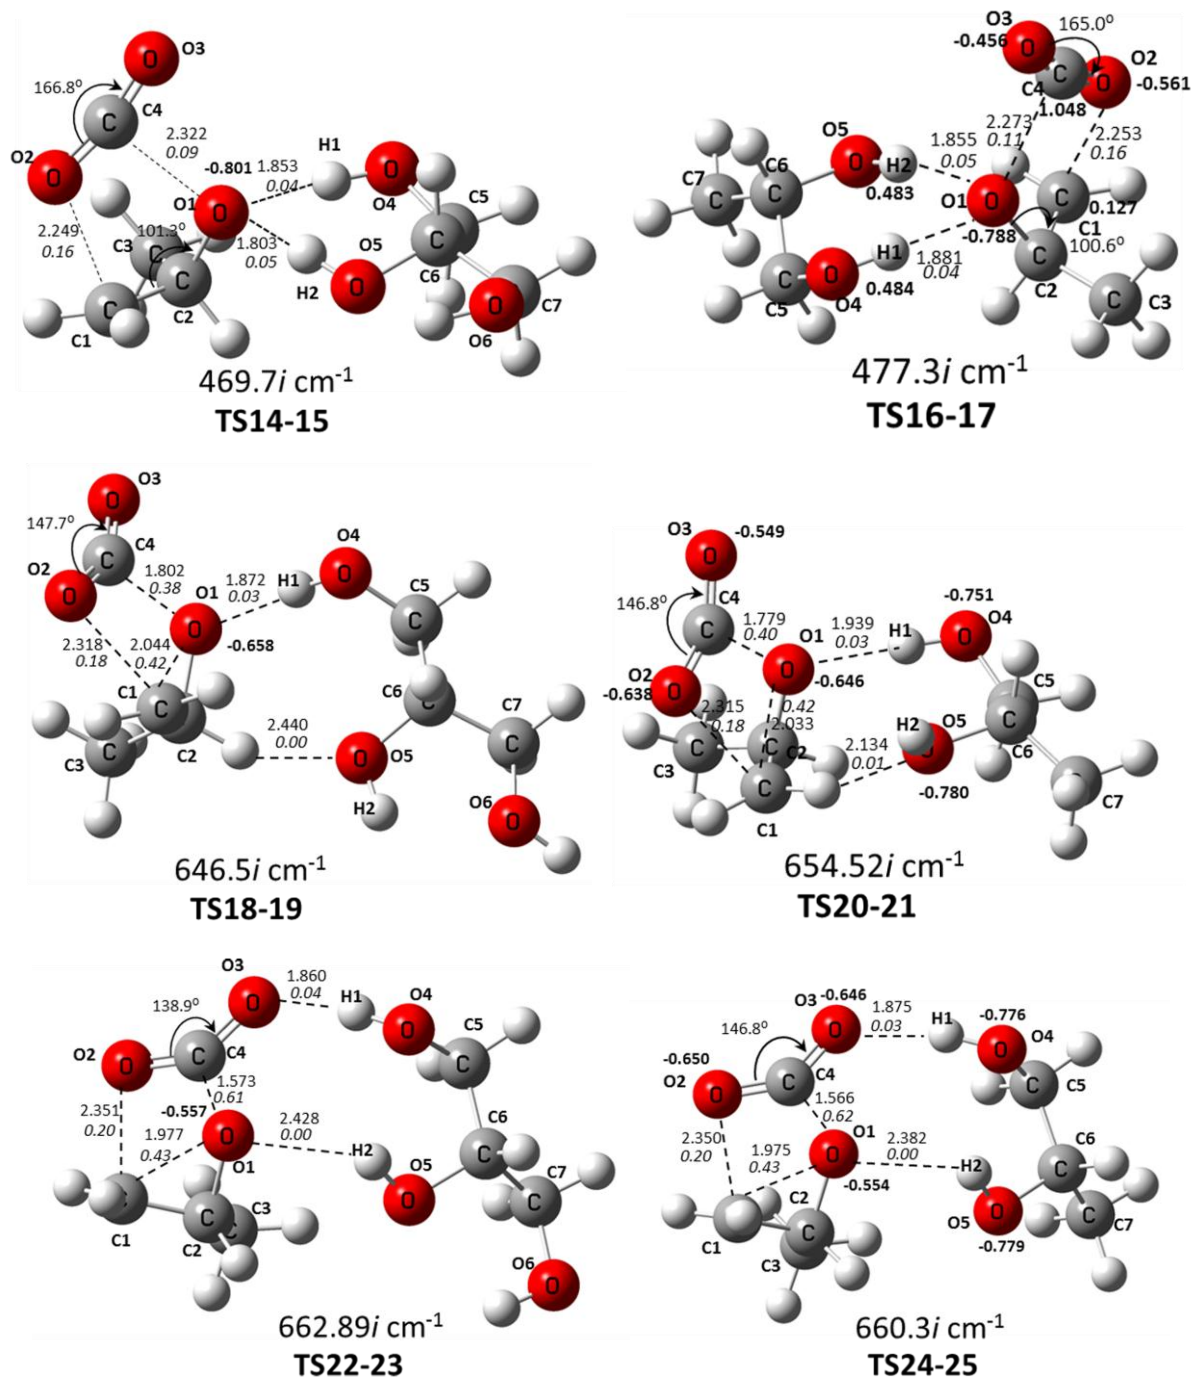

Figure S5. Optimized geometries of the transition states in the pathways of Path 5, Path 6, Path 7, Path 8, Path 9 and Path 10.

**Table S1.** Potential energy of the pathways of cycloaddition of CO<sub>2</sub> in the presence of glycerol or PG.

| <i>Pathway</i>        | <b>In the gas phase</b> |                                |                              | <b>In the solution</b> |                                |                              |
|-----------------------|-------------------------|--------------------------------|------------------------------|------------------------|--------------------------------|------------------------------|
|                       | Structure               | Potential energy<br>(kcal/mol) | Energy barrier<br>(kcal/mol) | Structure              | Potential energy<br>(kcal/mol) | Energy barrier<br>(kcal/mol) |
| Path 1-a <sup>a</sup> | 1                       | -1.84                          |                              | 41                     | -0.57                          |                              |
|                       | TS1                     | 59.56                          | 61.39                        | TS41-42                | 51.08                          | 51.64                        |
|                       | PC                      | -12.28                         |                              | 42                     | -15.82                         |                              |
| Path 5                | 14                      | -10.81                         |                              | --                     | --                             | --                           |
|                       | TS14-15                 | 48.81                          | 59.62                        | --                     | --                             | --                           |
|                       | 15                      | -17.00                         |                              | --                     | --                             | --                           |
| Path 6                | 16                      | -10.11                         |                              | --                     | --                             | --                           |
|                       | TS16-17                 | 49.23                          | 59.34                        | --                     | --                             | --                           |
|                       | 17                      | -17.45                         |                              | --                     | --                             | --                           |
| Path 7                | 18                      | -9.14                          |                              | 54                     | -4.40                          |                              |
|                       | TS18-19                 | 51.23                          | 60.37                        | TS54-55                | 47.21                          | 51.61                        |
|                       | 19                      | -16.75                         |                              | 55                     | -18.35                         |                              |
| Path 8                | 20                      | -6.48                          |                              | 56                     | -4.48                          |                              |
|                       | TS20-21                 | 52.25                          | 58.74                        | TS56-57                | 46.68                          | 51.52                        |
|                       | 21                      | -19.77                         |                              | 57                     | -18.97                         |                              |
| Path 9                | 22                      | -9.05                          |                              | 58                     | -5.81                          |                              |
|                       | TS22-23                 | 50.33                          | 59.38                        | TS58-59                | 45.31                          | 51.11                        |
|                       | 23                      | -19.85                         |                              | 59                     | -20.98                         |                              |
| Path 10               | 24                      | -8.89                          |                              | 60                     | -5.62                          |                              |
|                       | TS24-25                 | 50.02                          | 59.00                        | TS60-61                | 45.08                          | 50.69                        |
|                       | 25                      | -19.93                         |                              | 61                     | -21.19                         |                              |

<sup>a</sup> The reference reaction pathway cycloaddition of CO<sub>2</sub> and PO without any other reagents.



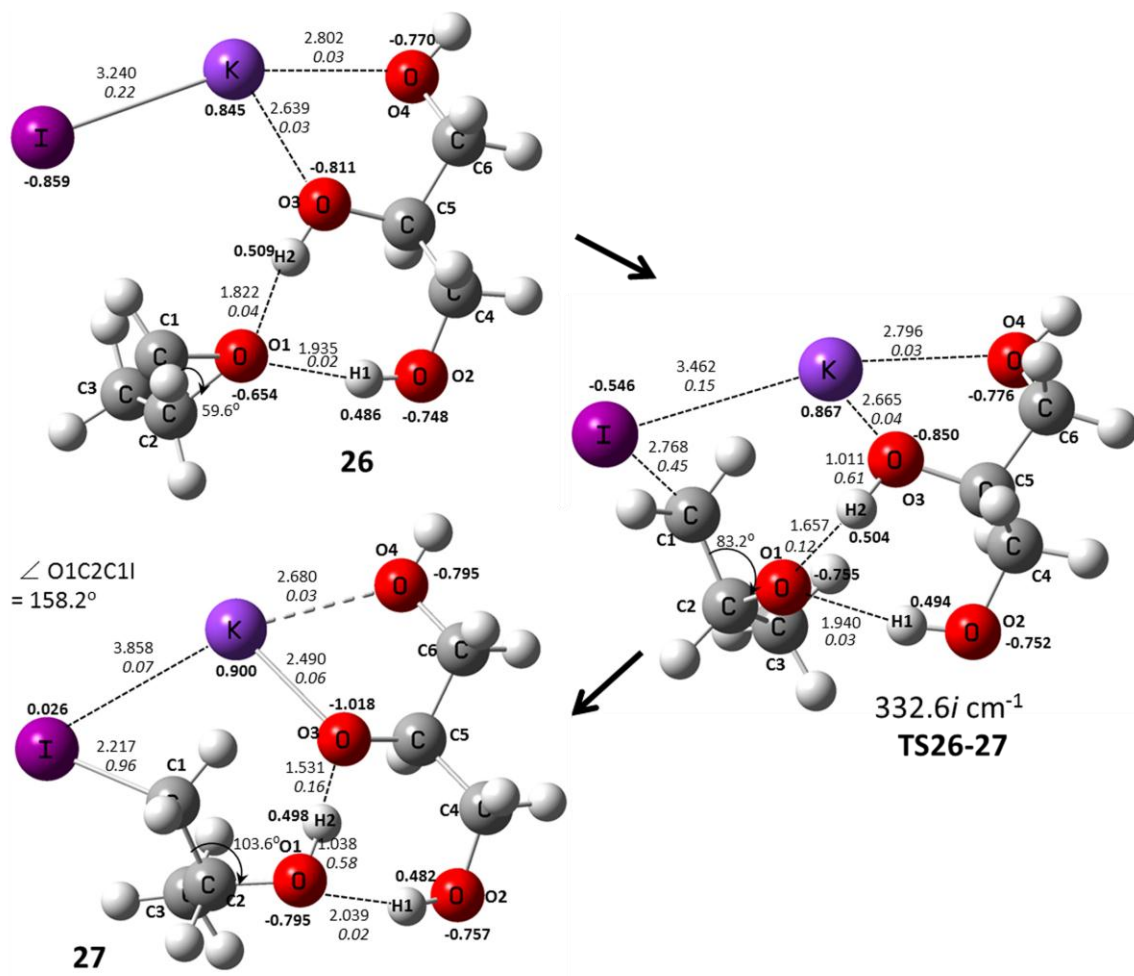

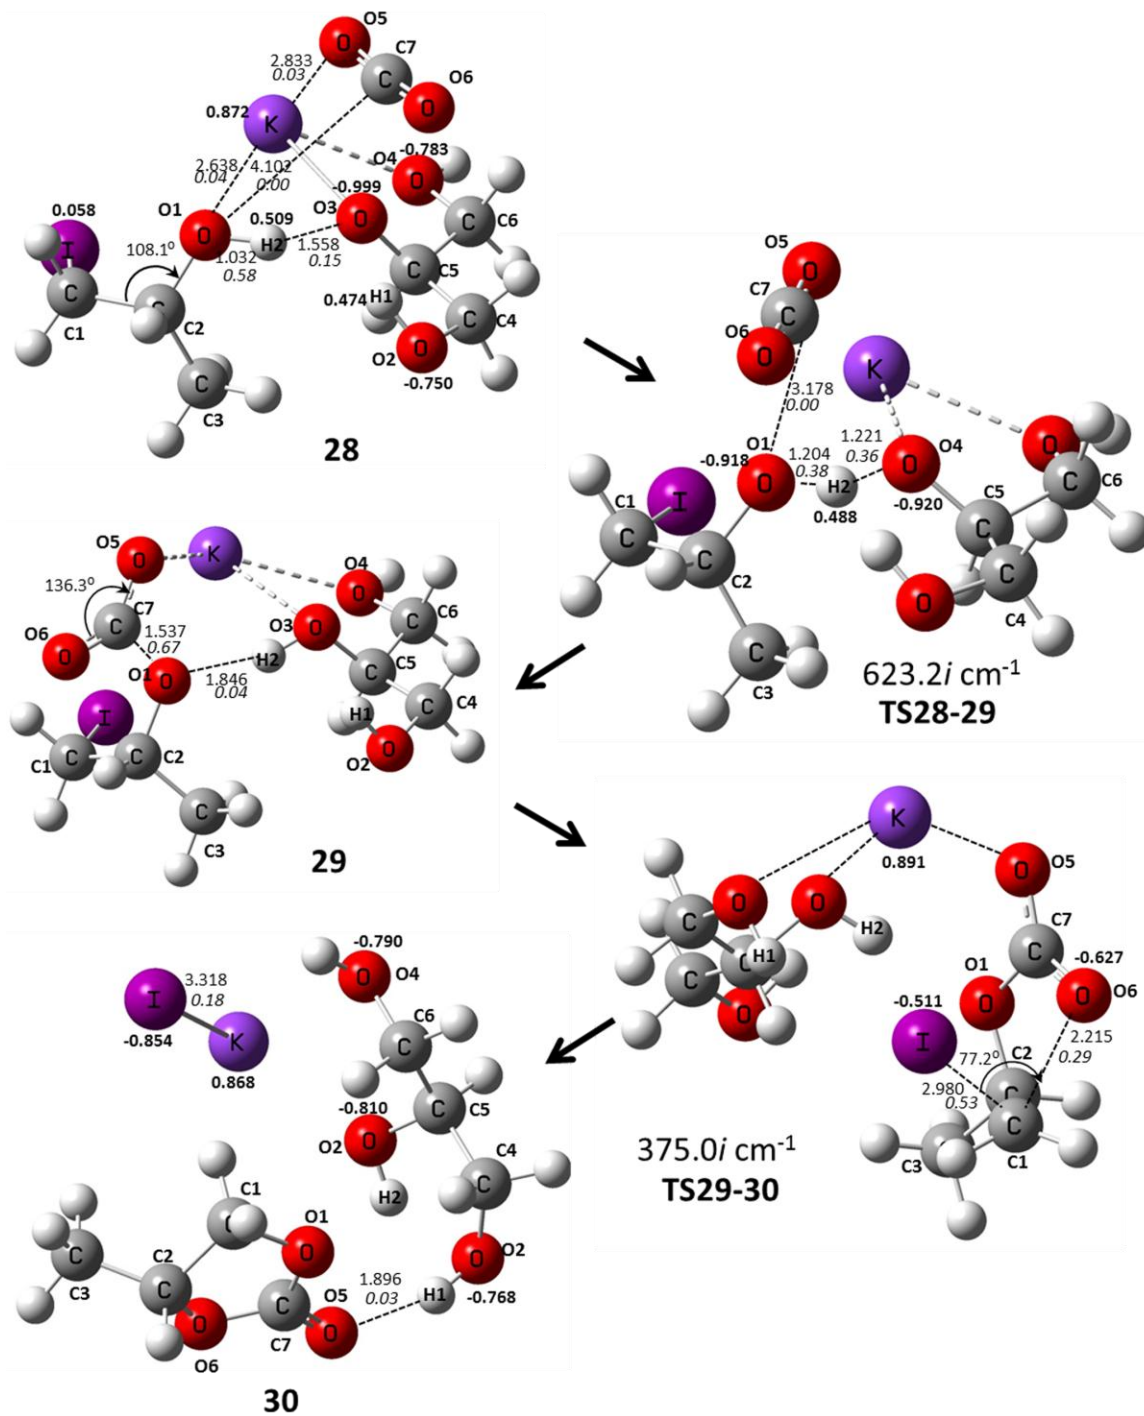

**Figure S6.** Optimized geometries of the reactants, intermediates, transition states and products of the cycloaddition of CO<sub>2</sub> in the presence of KI/glycerol (Path 11). The bond distances (in angstroms), bond orders (italic), angles (in degrees) and atomic charges (bold) are labeled in the corresponding positions. For TS<sub>n</sub>-m, the imaginary vibrational frequencies (cm<sup>-1</sup>) are shown (in the bracket).

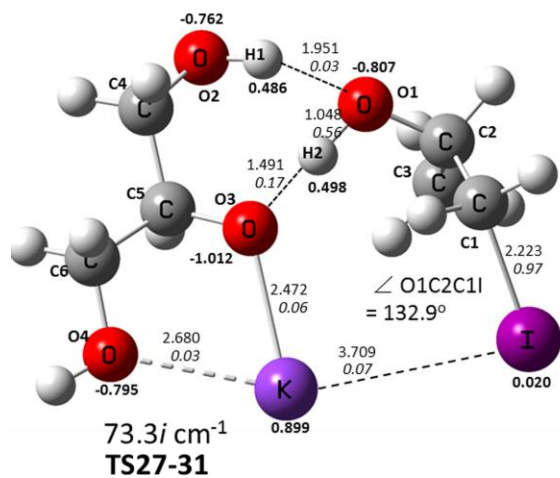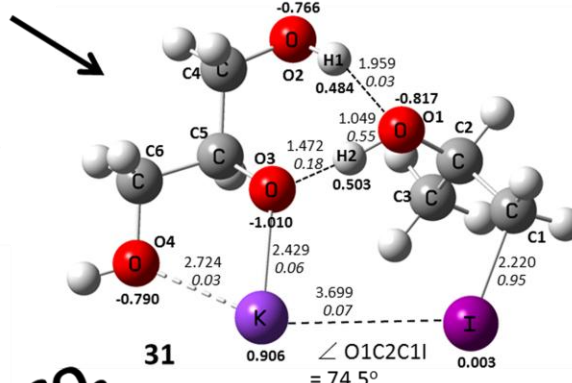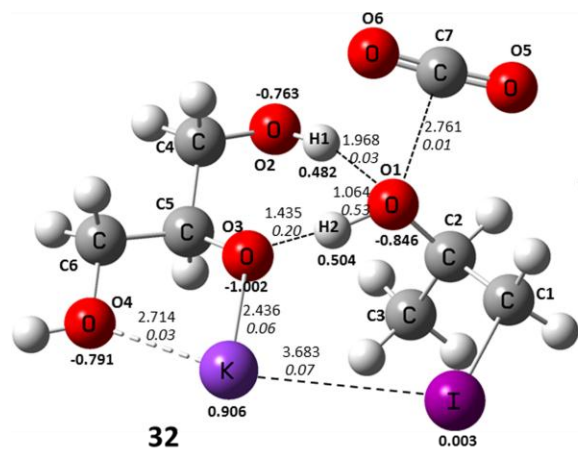

$+\text{CO}_2$

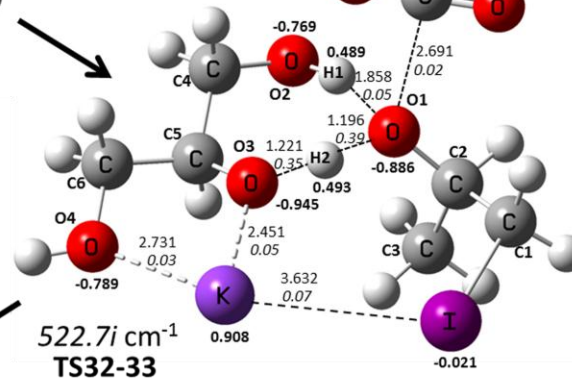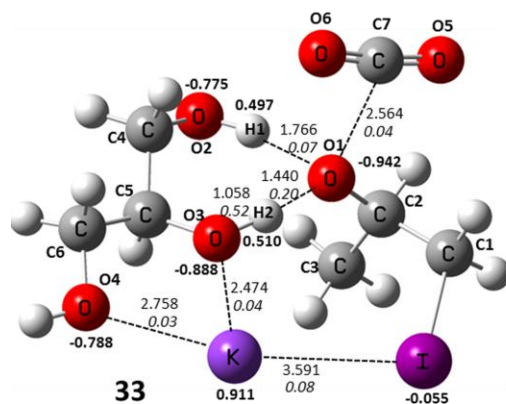

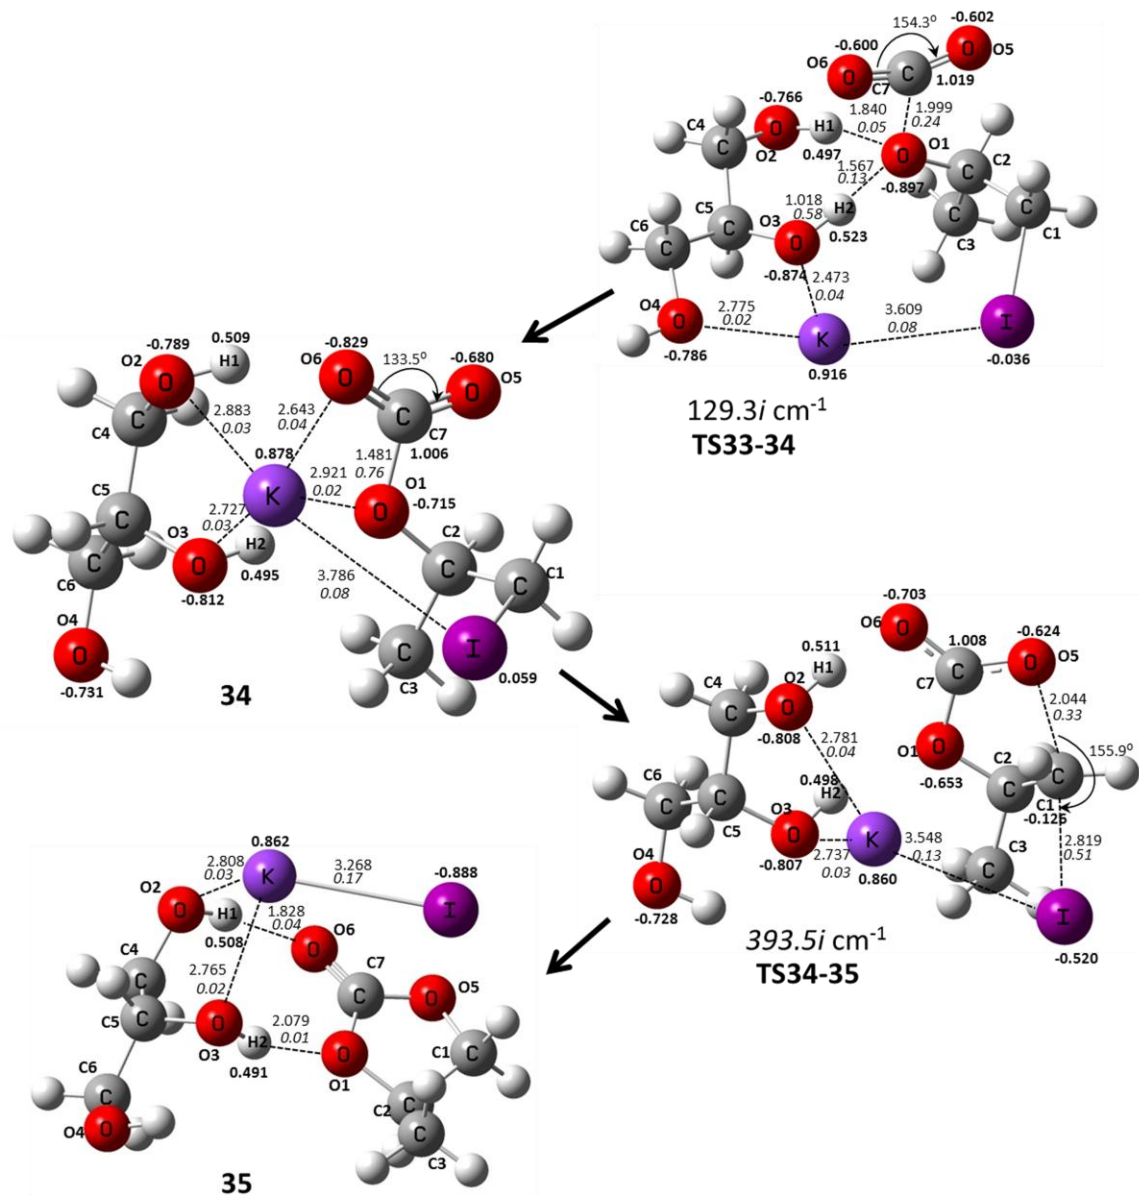

**Figure S7.** Optimized geometries of the reactants, intermediates, transition states and products of the cycloaddition of CO<sub>2</sub> in the presence of KI/Glycerol (Path 12). The bond distances (in angstroms), bond orders (italic), angles (in degrees) and atomic charges (bold) are labeled in the corresponding positions. For TS<sub>n-m</sub>, the imaginary vibrational frequencies (cm<sup>-1</sup>) are shown (in the bracket).

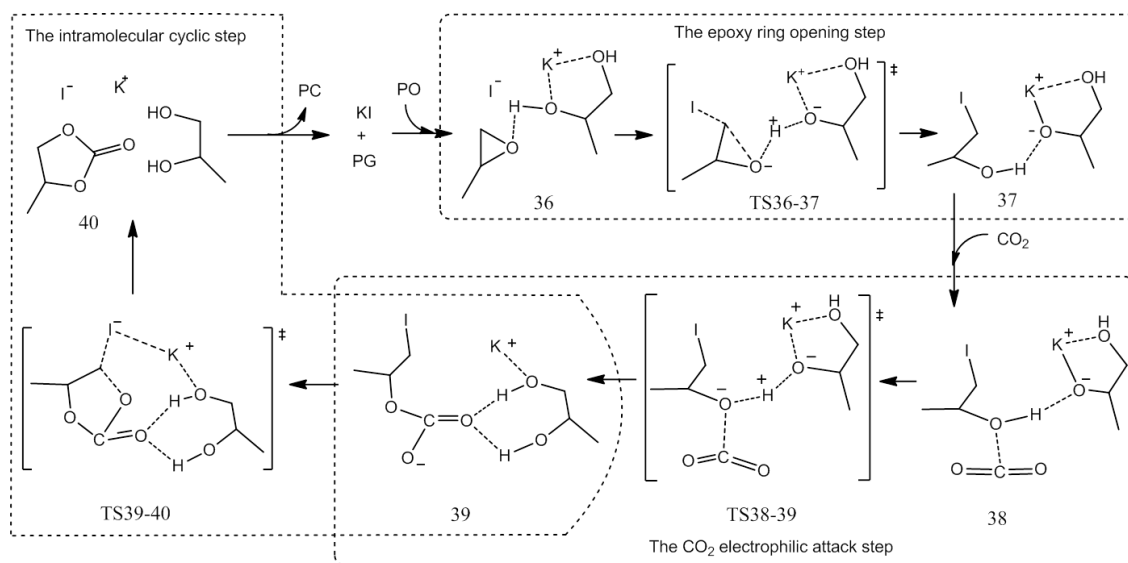

**Scheme S1.** The co-catalytic mechanism of PG with KI as catalyst for cycloaddition of CO<sub>2</sub> with PO (Path 13).

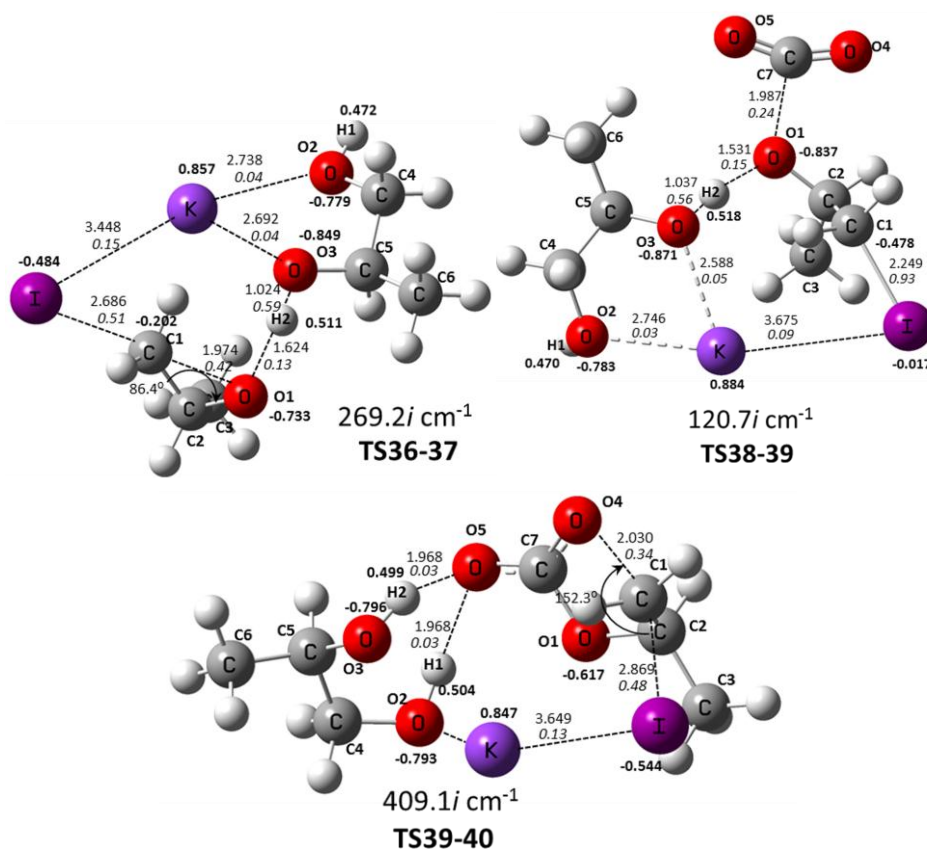

**Figure S8.** Optimized geometries of the transition state of Path 13. The bond distances (in angstroms), bond orders (*italic*), angles (in degrees) and atomic charges (**bold**) are labelled in the corresponding positions. The imaginary vibrational frequencies (cm<sup>-1</sup>) are shown.

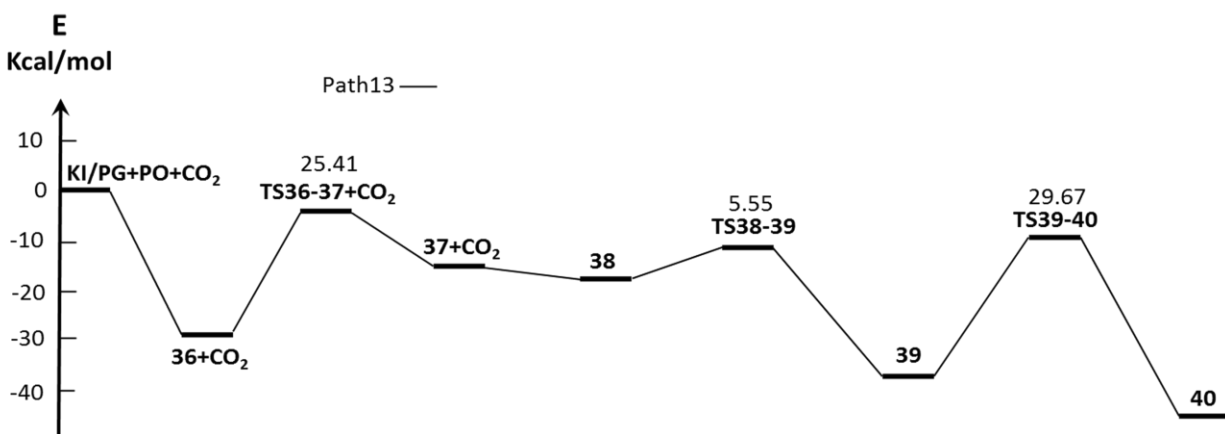

**Figure S9.** Potential energy curve of the pathway of cycloaddition of CO<sub>2</sub> with PO in the presence of KI/PG.

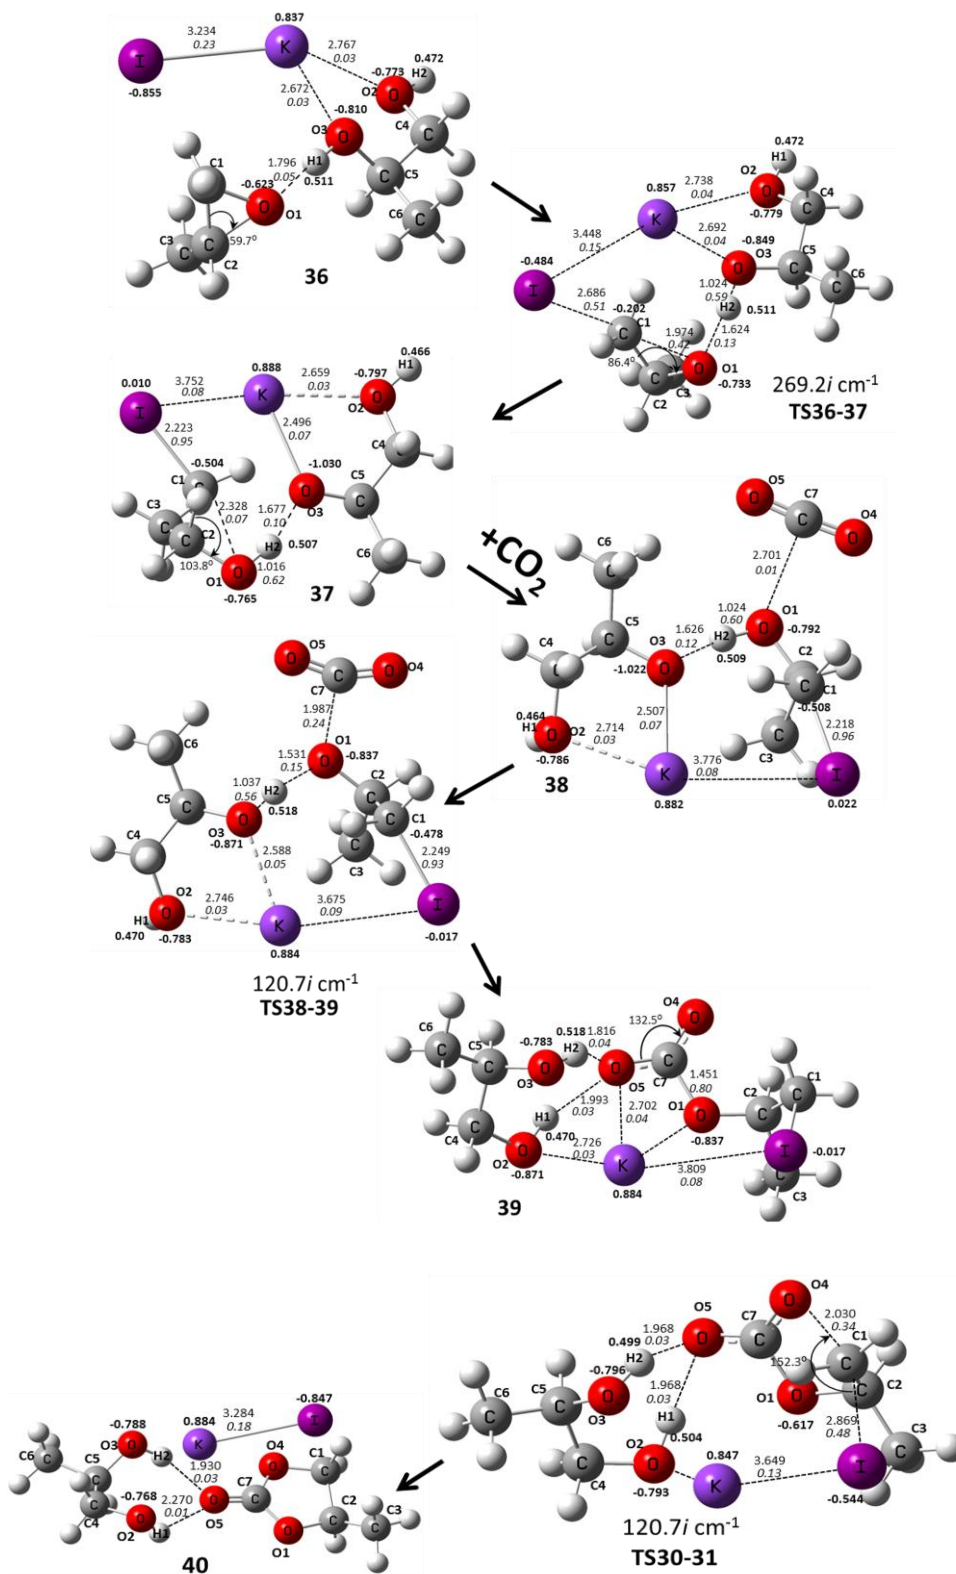

**Figure S10.** Optimized geometries of the reactants, intermediates, transition states and products of the cycloaddition of CO<sub>2</sub> in the presence of KI/PG (Path 13).

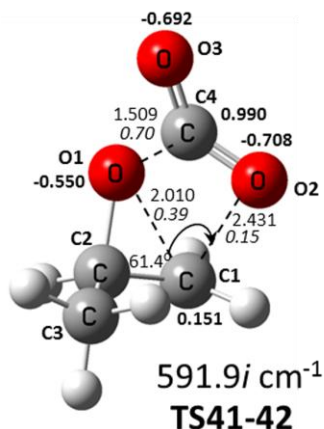

**Figure S11.** Optimized geometry of transition state of the non-catalyzed cycloaddition of CO<sub>2</sub> by taking into account of solvent effects

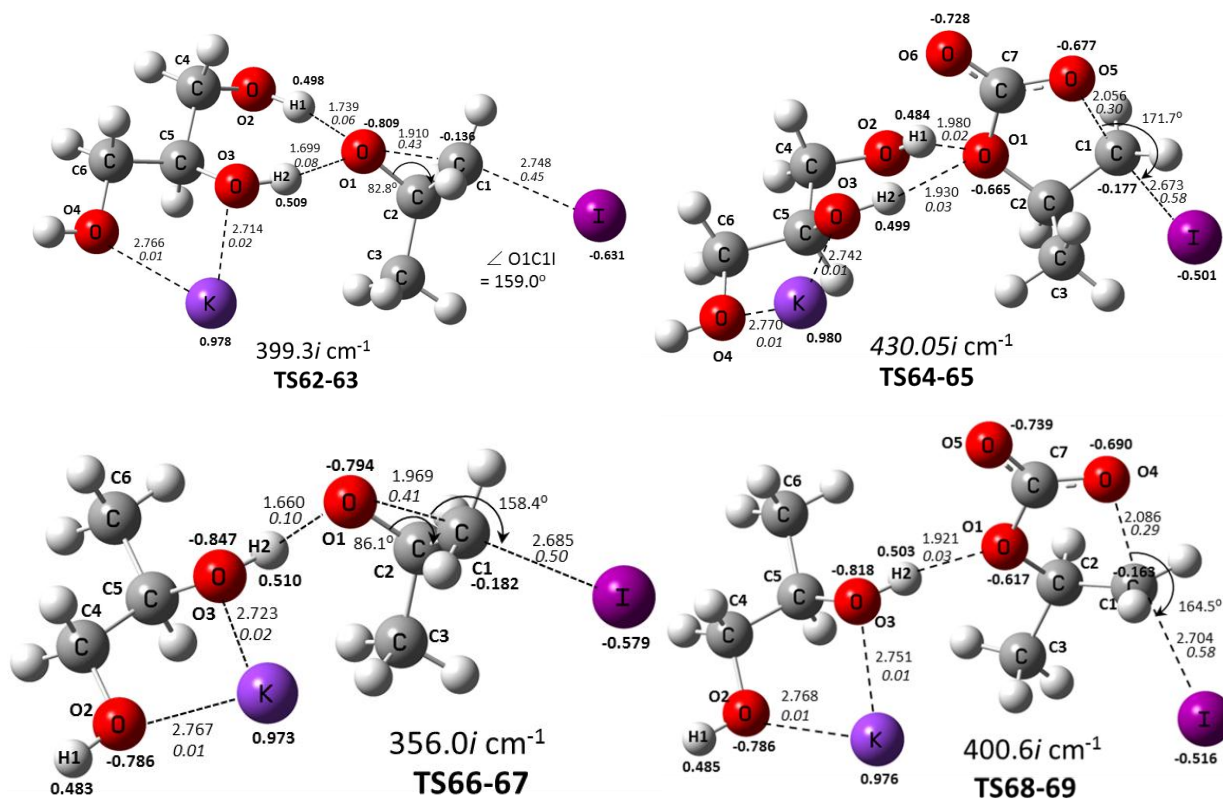

**Figure S12.** Optimized geometries of the transition state of Path 17 (TS62-63, TS62-63) and Path 18 (TS66-67, TS68-69). The bond distances (in angstroms), bond orders (*italic*), angles (in degrees) and atomic charges (**bold**) are labeled in the corresponding positions. The imaginary vibrational frequencies (cm<sup>-1</sup>) are shown.



**Table S2.** Potential energy and relative energies of the reactants, transition states, and products of noncatalyzed cycloaddition of CO<sub>2</sub> with PO.

| Species             | Potential energy<br>(hartree) | Potential energy<br>(kcal/mol) | Relative energy<br>(kcal/mol) |
|---------------------|-------------------------------|--------------------------------|-------------------------------|
| PO                  | -193.168445                   | -121215.1311                   |                               |
| CO <sub>2</sub>     | -188.646611                   | -118377.6349                   |                               |
| CO <sub>2</sub> +PO | -381.815056                   | -239592.7660                   | 0.00                          |
| 1                   | -381.817983                   | -239594.6023                   | -1.84                         |
| TS1                 | -381.720144                   | -239533.2076                   | 59.56                         |
| 2                   | -381.818154                   | -239594.7099                   | -1.94                         |
| TS2                 | -381.730040                   | -239539.4176                   | 53.35                         |
| PC                  | -381.834627                   | -239605.0469                   | -12.28                        |

**Table S3.** Potential energy and relative energies of the reactants, intermediates, transition states, and final products of KI catalyzed cycloaddition of CO<sub>2</sub> with PO.

| Species                | Potential energy<br>(hartree) | Potential energy<br>(kcal/mol) | Relative energy<br>(kcal/mol) |
|------------------------|-------------------------------|--------------------------------|-------------------------------|
| KI                     | -611.410637                   | -383666.2886                   |                               |
| PO+KI                  | -804.579082                   | -504881.4197                   | 0.00                          |
| PO+CO <sub>2</sub> +KI | -993.225693                   | -623259.0546                   | 0.00                          |
| 3                      | -993.255330                   | -623277.6524                   | -18.60                        |
| TS3-4                  | -993.197443                   | -623241.3271                   | 17.73                         |
| 4                      | -993.250423                   | -623274.5729                   | -15.52                        |
| TS4-5                  | -993.2422027                  | -623269.4146                   | -10.36                        |
| 5                      | -993.2451475                  | -623271.2625                   | -12.21                        |
| TS5-6                  | -993.2180253                  | -623254.2431                   | 4.81                          |
| 6                      | -993.275735                   | -623290.4563                   | -31.40                        |
| 7                      | -993.255683                   | -623277.8735                   | -18.82                        |
| TS7-8                  | -993.197436                   | -623241.3231                   | 17.73                         |
| 8                      | -993.243734                   | -623270.3753                   | -11.32                        |
| TS8-9                  | -993.196442                   | -623240.6996                   | 18.36                         |
| 9                      | -993.276196                   | -623290.7457                   | -31.69                        |
| 10                     | -804.602199                   | -504895.9261                   | -14.51                        |
| TS10-11                | -804.542228                   | -504858.2935                   | 23.13                         |
| 11                     | -804.579158                   | -504881.4674                   | -0.05                         |
| 12                     | -993.250415                   | -623274.5681                   | -15.51                        |
| TS12-13                | -993.185782                   | -623234.0099                   | 25.04                         |
| 13                     | -993.275664                   | -623290.4119                   | -31.36                        |

**Table S4.** Potential energy and relative energies of the reactants, intermediates, transition states, and final products of the cycloaddition of CO<sub>2</sub> with PO in the presence of glycerol (and PG) (Paths 5 to 10).

| Species                      | Potential energy (hartree) | Potential energy (kcal/mol) | Relative energy (kcal/mol) |
|------------------------------|----------------------------|-----------------------------|----------------------------|
| Glycerol                     | -344.903431                | -216430.3518                |                            |
| CO <sub>2</sub> +PO+Glycerol | -726.718487                | -456023.1178                | 0.00                       |
| 14                           | -726.735711                | -456033.9259                | -10.81                     |
| TS14-15                      | -726.640702                | -455974.3066                | 48.81                      |
| 15                           | -726.745576                | -456040.1167                | -17.00                     |
| PG                           | -269.663883                | -169216.7832                |                            |
| CO <sub>2</sub> +PO+PG       | -651.478939                | -408809.5492                | 0.00                       |
| 16                           | -651.495043                | -408819.6546                | -10.11                     |
| TS16-17                      | -651.400483                | -408760.3170                | 49.23                      |
| 17                           | -651.506741                | -408826.9947                | -17.45                     |
| 18                           | -726.733047                | -456032.2545                | -9.14                      |
| TS18-19                      | -726.636839                | -455971.883                 | 51.23                      |
| 19                           | -726.745184                | -456039.8703                | -16.75                     |
| 20                           | -651.489272                | -408816.0333                | -6.48                      |
| TS20-21                      | -651.395669                | -408757.2963                | 52.25                      |
| 21                           | -651.510438                | -408829.3147                | -19.77                     |
| 22                           | -726.732910                | -456032.1683                | -9.05                      |
| TS22-23                      | -726.638276                | -455972.7843                | 50.33                      |
| 23                           | -726.750118                | -456042.9668                | -19.85                     |
| 24                           | -651.493257                | -408818.5336                | -8.98                      |
| TS24-25                      | -651.399235                | -408759.5338                | 50.02                      |
| 25                           | -651.510692                | -408829.4746                | -19.93                     |

**Table S5.** Potential energy and relative energies of the reactants, intermediates, transition states, and final products of KI catalyzed cycloaddition of CO<sub>2</sub> by taking into account of solvent effects (Paths 14 to 16).

| Species                        | Potential energy (hartree) | Potential energy (kcal/mol) | Relative energy (kcal/mol) |
|--------------------------------|----------------------------|-----------------------------|----------------------------|
| Glycerol+KI+PO                 | -1149.482513               | -721311.7715                | 0.00                       |
| 26                             | -1149.530194               | -721341.6917                | -29.92                     |
| TS26-27                        | -1149.491690               | -721317.5301                | -5.76                      |
| 27                             | -1149.506296               | -721326.6955                | -14.92                     |
| Glycerol+KI+PO+CO <sub>2</sub> | -1338.129124               | -839689.4064                | 0.00                       |
| 28                             | -1338.176818               | -839719.3352                | -29.93                     |
| TS28-29                        | -1338.174785               | -839718.0595                | -28.65                     |
| 29                             | -1338.180396               | -839721.5805                | -32.17                     |
| TS29-30                        | -1338.119358               | -839683.2781                | 6.13                       |
| 30                             | -1338.204658               | -839736.8049                | -47.40                     |
| TS27-31                        | -1149.505886               | -721326.4385                | -14.67                     |
| 31                             | -1149.512885               | -721330.8306                | -19.06                     |
| 32                             | -1338.164489               | -839711.5987                | -22.19                     |
| TS32-33                        | -1338.163551               | -839711.0099                | -21.60                     |
| 33                             | -1338.163481               | -839710.9657                | -21.56                     |
| TS33-34                        | -1338.159968               | -839708.7617                | -19.36                     |
| 34                             | -1338.188407               | -839726.607                 | -37.20                     |
| TS34-35                        | -1338.143555               | -839698.462                 | -9.06                      |
| 35                             | -1338.200455               | -839734.1672                | -44.76                     |
| PG+KI+PO                       | -651.393923                | -408756.2007                | 0.00                       |
| 36                             | -1074.289719               | -674127.5416                | -29.34                     |
| TS36-37                        | -1074.249219               | -674102.1272                | -3.92                      |
| 37                             | -1074.264089               | -674111.4588                | -13.26                     |
| 38                             | -1262.916118               | -792492.493                 | -16.66                     |
| TS38-39                        | -1262.907266               | -792486.9383                | -11.10                     |
| 39                             | -1262.951097               | -792514.4427                | -38.60                     |
| TS39-40                        | -1262.903816               | -792484.7738                | -8.94                      |
| 40                             | -1262.963141               | -792522.0008                | -46.16                     |

**Table S6.** Potential energy and relative energies of the reactants, transition states, and PC of noncatalyzed cycloaddition of CO<sub>2</sub> by taking into account of solvent effects (Paths 5 to 10 with the solven effects).

| Species                      | Potential energy (hartree) | Potential energy (kcal/mol) | Relative energy (kcal/mol) |
|------------------------------|----------------------------|-----------------------------|----------------------------|
| PO                           | -193.1734834               | -121218.2926                |                            |
| CO <sub>2</sub>              | -188.6494474               | -118379.4148                |                            |
| CO <sub>2</sub> +PO          | -381.822931                | -239597.7073                | 0.00                       |
| 41                           | -381.823836                | -239598.2753                | -0.57                      |
| TS41-42                      | -381.741536                | -239546.6311                | 51.08                      |
| 42                           | -381.848141                | -239613.5271                | -15.82                     |
| Glycerol                     | -344.9155183               | -216437.9369                |                            |
| CO <sub>2</sub> +PO+Glycerol | -726.7384492               | -456035.6442                | 0.00                       |
| 54                           | -726.7454562               | -456040.0412                | -4.40                      |
| TS54-55                      | -726.6632162               | -455988.4348                | 47.21                      |
| 55                           | -726.7676849               | -456053.99                  | -18.35                     |
| 58                           | -726.7477004               | -456041.4495                | -5.81                      |
| TS58-59                      | -726.6662443               | -455990.335                 | 45.31                      |
| 59                           | -726.7718882               | -456056.6276                | -20.98                     |
| PG                           | -269.672174                | -169221.9859                |                            |
| CO <sub>2</sub> +PO+PG       | -651.4951049               | -408819.6933                |                            |
| 56                           | -651.5028191               | -408824.534                 | -4.84                      |
| TS56-57                      | -651.4207138               | -408773.0121                | 46.68                      |
| 57                           | -651.5253349               | -408838.6629                | -18.97                     |
| 60                           | -651.5040605               | -408825.313                 | -5.62                      |
| TS60-61                      | -651.4232732               | -408774.6181                | 45.08                      |
| 61                           | -651.5288712               | -408840.882                 | -21.19                     |

**Table S7.** Potential energy and relative energies of the reactants, intermediates, transition states, and final products of KI/Glycerol (Path 17) and KI/PG (Path 18) catalyzed cycloaddition of CO<sub>2</sub> by taking into account of solvent effects.

| Species                        | Potential energy (hartree) | Potential energy (kcal/mol) | Relative energy (kcal/mol) |
|--------------------------------|----------------------------|-----------------------------|----------------------------|
| Glycerol+KI+PO                 | -1149.55492                | -721357.208                 | 0.00                       |
| 62                             | -1149.573702               | -721368.9938                | -11.79                     |
| TS62-63                        | -1149.542385               | -721349.3421                | 7.87                       |
| 63                             | -1149.556423               | -721358.1512                | -0.94                      |
| Glycerol+KI+PO+CO <sub>2</sub> | -1338.204368               | -839736.6228                | 0.00                       |
| 64                             | -1338.215394               | -839743.542                 | -6.92                      |
| TS64-65                        | -1338.19713                | -839732.0812                | 4.54                       |
| 65                             | -1338.236623               | -839756.8636                | -20.24                     |
| PG+KI+PO                       | -1074.311576               | -674141.257                 | 0.00                       |
| 66                             | -1074.329682               | -674152.6185                | -11.36                     |
| TS66-67                        | -1074.293774               | -674130.0863                | 11.17                      |
| 67                             | -1074.301848               | -674135.1526                | 6.10                       |
| PG+KI+PO+CO <sub>2</sub>       | -1262.961023               | -792520.6718                | 0.00                       |
| 68                             | -1262.975329               | -792529.6489                | -8.98                      |
| TS68-69                        | -1262.948535               | -792512.8352                | 7.84                       |
| 69                             | -1262.996725               | -792543.0751                | -22.40                     |

**Complete Reference 17:** Gaussian 09, Revision A.01, Frisch, M. J.; Trucks, G. W.; Schlegel, H. B.; Scuseria, G. E.; Robb, M. A.; Cheeseman, J. R.; Scalmani, G.; Barone, V.; Mennucci, B.; Petersson, G. A.; Nakatsuji, H.; Caricato, M.; Li, X.; Hratchian, H. P.; Izmaylov, A. F.; Bloino, J.; Zheng, G.; Sonnenberg, J. L.; Hada, M.; Ehara, M.; Toyota, K.; Fukuda, R.; Hasegawa, J.; Ishida, M.; Nakajima, T.; Honda, Y.; Kitao, O.; Nakai, H.; Vreven, T.; Montgomery, Jr., J. A.; Peralta, J. E.; Ogliaro, F.; Bearpark, M.; Heyd, J. J.; Brothers, E.; Kudin, K. N.; Staroverov, V. N.; Kobayashi, R.; Normand, J.; Raghavachari, K.; Rendell, A.; Burant, J. C.; Iyengar, S. S.; Tomasi, J.; Cossi, M.; Rega, N.; Millam, J. M.; Klene, M.; Knox, J. E.; Cross, J. B.; Bakken, V.; Adamo, C.; Jaramillo, J.; Gomperts, R.; Stratmann, R. E.; Yazyev, O.; Austin, A. J.; Cammi, R.; Pomelli, C.; Ochterski, J. W.; Martin, R. L.; Morokuma, K.; Zakrzewski, V. G.; Voth, G. A.; Salvador, P.; Dannenberg, J. J.; Dapprich, S.; Daniels, A. D.; Farkas, O.; Foresman, J. B.; Ortiz, J. V.; Cioslowski, J.; Fox, D. J. Gaussian, Inc., Wallingford CT, **2009**.

## The cartesian coordinates of the optimized geometries of the transition states

1. The cartesian coordinates of the optimized geometries of the transition states in Path 1-a and Path 1-b.

| Transition state TS1 |           |           |           | Transition state TS2 |           |           |           |
|----------------------|-----------|-----------|-----------|----------------------|-----------|-----------|-----------|
| O                    | -0.485929 | 0.483452  | 0.308451  | O                    | -0.669945 | 0.561239  | 0.413978  |
| C                    | 0.174214  | -0.710373 | 1.25815   | C                    | 0.039319  | -0.553772 | 1.383882  |
| O                    | -0.104011 | -1.789799 | 0.720128  | O                    | -0.275576 | -1.681144 | 0.984839  |
| O                    | 0.769931  | -0.236876 | 2.180513  | O                    | 0.708954  | 0.000009  | 2.211691  |
| C                    | -1.219098 | -0.783625 | -1.033164 | C                    | -1.134899 | -0.774209 | -1.10249  |
| H                    | -1.43239  | -1.840748 | -0.955418 | H                    | -1.208332 | -1.847437 | -0.970933 |
| H                    | -0.562353 | -0.456036 | -1.83219  | C                    | -1.8741   | 0.131805  | -0.213771 |
| C                    | -1.816311 | 0.250082  | -0.191362 | H                    | -2.339745 | 0.986273  | -0.716595 |
| H                    | -2.099552 | 1.148551  | -0.751349 | H                    | -2.572821 | -0.362857 | 0.465351  |
| C                    | -2.875334 | -0.130572 | 0.826     | C                    | -0.272795 | -0.283864 | -2.190561 |
| H                    | -3.009804 | 0.687708  | 1.540138  | H                    | 0.737137  | -0.705571 | -2.104865 |
| H                    | -3.830753 | -0.303868 | 0.316014  | H                    | -0.683365 | -0.696962 | -3.128879 |
| H                    | -2.598145 | -1.035634 | 1.373293  | H                    | -0.217649 | 0.804295  | -2.245535 |

2. The cartesian coordinates of the optimized geometries of the transition states in Path 2.

| Transition state TS3-4 |           |           |           | Transition state TS4-5 |             |             |           | Transition state TS5-6 |             |             |             |
|------------------------|-----------|-----------|-----------|------------------------|-------------|-------------|-----------|------------------------|-------------|-------------|-------------|
| C                      | -3.475409 | -1.00282  | -0.56003  | C                      | -0.50583658 | 0.85603112  | 0         | C                      | -1.51750974 | 0.40856031  | 0.00000000  |
| O                      | -2.851771 | -1.970901 | -0.319436 | O                      | -1.55963458 | 0.22009912  | -0.243036 | O                      | -2.73188274 | 0.53321131  | -0.22480500 |
| O                      | -4.170588 | -0.110089 | -0.83638  | O                      | -0.01693258 | 1.89245412  | -0.43447  | O                      | -0.60041074 | 1.28134031  | 0.05250300  |
| K                      | -0.251326 | -1.799545 | 0.705989  | K                      | -1.31434958 | -1.92402888 | 1.014234  | K                      | -3.47185374 | -1.90006669 | -0.32672700 |
| I                      | 2.328401  | 0.010676  | -0.207872 | I                      | 4.28358142  | -0.47829288 | 0.562527  | I                      | 3.54556226  | -0.92348169 | -0.14440000 |
| O                      | -1.355368 | 0.419264  | 0.521466  | O                      | 0.28150142  | 0.12628812  | 1.027756  | O                      | -1.06801374 | -0.89819169 | 0.21108800  |
| C                      | -0.04475  | 1.957912  | -0.165923 | C                      | 2.53762542  | 0.84585812  | 0.340121  | C                      | 1.01502226  | 0.29341431  | 0.02732100  |
| H                      | -0.165712 | 1.765106  | -1.226246 | H                      | 2.11096142  | 0.57596212  | -0.621161 | H                      | 1.14000826  | 0.38660131  | -1.04000800 |
| C                      | -1.223501 | 1.794928  | 0.701677  | C                      | 1.51956342  | 0.69529512  | 1.491139  | C                      | 0.34802526  | -0.94027169 | 0.61354900  |
| H                      | -0.976553 | 2.052798  | 1.748465  | H                      | 1.88201142  | -0.05921988 | 2.195276  | H                      | 0.73847326  | -1.84055469 | 0.14388200  |
| H                      | 0.892447  | 2.389767  | 0.158672  | H                      | 2.96228442  | 1.84608012  | 0.273887  | H                      | 1.52801626  | 1.00299031  | 0.65521700  |
| C                      | -2.439802 | 2.624771  | 0.271118  | C                      | 1.31737142  | 2.00065612  | 2.267807  | C                      | 0.43986226  | -1.02057969 | 2.13102100  |
| H                      | -2.682865 | 2.443     | -0.781581 | H                      | 0.96538042  | 2.80007412  | 1.612513  | H                      | 0.02606626  | -0.11766469 | 2.59469900  |
| H                      | -3.302673 | 2.320045  | 0.876464  | H                      | 0.58339242  | 1.84792212  | 3.067723  | H                      | -0.11029374 | -1.89257369 | 2.50233600  |
| H                      | -2.272141 | 3.699865  | 0.421394  | H                      | 2.26549342  | 2.30381812  | 2.729834  | H                      | 1.48912826  | -1.12133469 | 2.42348200  |

3. The cartesian coordinates of the optimized geometries of the transition states in Path 3

| Transition state TS7-8 |             |             |             | Transition state TS8-9 |             |             |             |
|------------------------|-------------|-------------|-------------|------------------------|-------------|-------------|-------------|
| O                      | -1.84602600 | -1.29549100 | .19844700   | O                      | 0.27284500  | -0.90626300 | 1.61984000  |
| C                      | -3.34990700 | -2.18792400 | -0.27089000 | C                      | -0.43589900 | -1.35765600 | 0.50437700  |
| O                      | -3.71824500 | -1.80732800 | -1.37303800 | O                      | -0.22313300 | -0.63976600 | -0.54089100 |
| O                      | -3.55677100 | -2.92909300 | 0.63399700  | O                      | -1.14630700 | -2.34797300 | 0.61857900  |
| C                      | -1.11552300 | -0.51746500 | -1.31205100 | C                      | 1.58821100  | 0.47474400  | 0.11956700  |
| H                      | -1.72221300 | -1.05624800 | -2.01128300 | H                      | 2.09565900  | -0.38660000 | -0.29550600 |
| H                      | -0.05620300 | -0.73942800 | -1.30076900 | H                      | 2.06596100  | 1.42825600  | -0.06206500 |
| C                      | -1.72576300 | 0.10022200  | -0.13047400 | C                      | 0.88735400  | 0.35962000  | 1.42478400  |
| H                      | -0.97357900 | 0.54506600  | 0.52911500  | H                      | 1.71735900  | 0.38713000  | 2.15977500  |
| C                      | -2.96852800 | 0.96758200  | -0.14395000 | C                      | -0.06927300 | 1.51505500  | 1.73901400  |
| H                      | -3.34352900 | 1.07409500  | 0.88040200  | H                      | -0.47944800 | 1.38377500  | 2.74450000  |
| H                      | -2.70847400 | 1.96015400  | -0.52623700 | H                      | 0.45584600  | 2.47577300  | 1.69302000  |
| H                      | -3.77423600 | 0.55147900  | -0.75276600 | H                      | -0.88795700 | 1.53358600  | 1.01447000  |
| K                      | -3.86565900 | -0.39100200 | -3.56305400 | K                      | -1.27368800 | -0.80607100 | -2.79723000 |
| I                      | -0.96202400 | 1.31549000  | -3.50198900 | I                      | 0.93449600  | 1.73287300  | -2.53587200 |

4. The cartesian coordinates of the optimized geometries of the transition states in Path 4

| Transition state TS10-11 |             |             |             | Transition state TS12-13 |             |             |             |
|--------------------------|-------------|-------------|-------------|--------------------------|-------------|-------------|-------------|
| O                        | -1.08692800 | 0.68894300  | 0.32814900  | O                        | 1.01164700  | 1.37062200  | 1.69121100  |
| C                        | -2.74533700 | 0.95547800  | -1.01648100 | C                        | -0.74287100 | 1.55954200  | -0.02432900 |
| H                        | -2.92990200 | 0.80179300  | -2.07162400 | H                        | -0.66043900 | 1.41479500  | -1.09240900 |
| H                        | -3.55036700 | 0.71563200  | -0.33099100 | H                        | -1.74365300 | 1.77976300  | 0.32180500  |
| C                        | -1.58546500 | 1.69693700  | -0.48430100 | C                        | 0.43676400  | 2.20158000  | 0.67165600  |
| H                        | -0.88416300 | 1.96402300  | -1.29784700 | H                        | 1.24057800  | 2.33425200  | -0.06000100 |
| C                        | -1.96790600 | 2.97907700  | 0.26979300  | C                        | 0.02504500  | 3.55602800  | 1.26541600  |
| H                        | -1.06579600 | 3.37071000  | 0.75720700  | H                        | 0.89274800  | 4.02351700  | 1.74282400  |
| H                        | -2.36893300 | 3.75366600  | -0.39856600 | H                        | -0.34401100 | 4.23195400  | 0.48445100  |
| H                        | -2.70723300 | 2.75822100  | 1.04895300  | H                        | -0.76028000 | 3.42183600  | 2.01651500  |
| K                        | -0.56608800 | -1.61118000 | 0.83343300  | K                        | 2.53942300  | -1.10578200 | 1.66103000  |
| I                        | -2.69443600 | -1.97489500 | -1.65249800 | I                        | 0.32462800  | -1.07343200 | -0.93835000 |
| O                        | -1.08692800 | 0.68894300  | 0.32814900  | C                        | 0.11973100  | 0.45564900  | 2.30613200  |
| C                        | -2.74533700 | 0.95547800  | -1.01648100 | O                        | -1.04528800 | 0.44068500  | 1.83176300  |
| H                        | -2.92990200 | 0.80179300  | -2.07162400 | O                        | 0.64973500  | -0.24570900 | 3.18252100  |

| 5. The cartesian coordinates of the optimized geometries of the transition states in Path 5 and 6 |           |           |           |                          |           |           |           |
|---------------------------------------------------------------------------------------------------|-----------|-----------|-----------|--------------------------|-----------|-----------|-----------|
| Transition state TS14-15                                                                          |           |           |           | Transition state TS16-17 |           |           |           |
| O                                                                                                 | -0.660212 | 0.560803  | 0.273136  | O                        | -0.842100 | 0.287875  | 0.441206  |
| C                                                                                                 | 0.725566  | -0.988887 | 1.307943  | C                        | -2.337577 | -1.424302 | 0.414823  |
| O                                                                                                 | 0.169727  | -1.906597 | 0.787877  | O                        | -2.735517 | -1.155994 | -0.678307 |
| O                                                                                                 | 1.423920  | -0.286245 | 1.916100  | O                        | -2.146633 | -1.914409 | 1.453361  |
| C                                                                                                 | -1.283386 | -1.259545 | -0.802074 | C                        | -1.483327 | 0.442614  | -1.654931 |
| H                                                                                                 | -1.630623 | -2.273551 | -0.613003 | H                        | -2.394655 | 0.480498  | -2.248241 |
| H                                                                                                 | -0.514116 | -1.128604 | -1.558174 | H                        | -0.684780 | -0.215257 | -1.991341 |
| C                                                                                                 | -1.819404 | -0.048928 | -0.173259 | C                        | -1.208773 | 1.266127  | -0.470881 |
| H                                                                                                 | -2.283222 | 0.524068  | -1.017666 | H                        | -0.336197 | 1.902353  | -0.759166 |
| C                                                                                                 | -2.894516 | -0.258942 | 0.899289  | C                        | -2.334779 | 2.192073  | -0.001992 |
| H                                                                                                 | -3.208820 | 0.713110  | 1.289222  | H                        | -2.009119 | 2.727875  | 0.893981  |
| H                                                                                                 | -3.769372 | -0.769196 | 0.476661  | H                        | -2.584548 | 2.925325  | -0.779574 |
| H                                                                                                 | -2.496609 | -0.851099 | 1.729738  | H                        | -3.230363 | 1.614565  | 0.249063  |
| H                                                                                                 | -1.906396 | 3.808022  | -0.976465 | H                        | 2.453485  | 1.598401  | -0.056128 |
| C                                                                                                 | -1.025735 | 3.980928  | -0.335512 | C                        | 2.602263  | 0.806026  | 0.698647  |
| C                                                                                                 | 0.234197  | 3.625352  | -1.127753 | C                        | 2.637369  | -0.549477 | -0.016863 |
| O                                                                                                 | -1.146566 | 3.279818  | 0.896174  | O                        | 1.630870  | 0.891468  | 1.732441  |
| H                                                                                                 | -1.003341 | 5.044932  | -0.070560 | H                        | 3.568453  | 0.984019  | 1.184666  |
| C                                                                                                 | 0.465754  | 4.570671  | -2.305191 | C                        | 3.804316  | -0.650523 | -0.991763 |
| O                                                                                                 | 0.150923  | 2.312316  | -1.703392 | O                        | 1.434247  | -0.769883 | -0.769394 |
| H                                                                                                 | 1.102435  | 3.672767  | -0.452292 | H                        | 2.727111  | -1.334461 | 0.750873  |
| H                                                                                                 | -1.002845 | 2.318768  | 0.747131  | H                        | 0.731135  | 0.740574  | 1.367903  |
| O                                                                                                 | 1.588563  | 4.169035  | -3.079994 | H                        | 3.757850  | 0.151931  | -1.738658 |
| H                                                                                                 | -0.440642 | 4.604580  | -2.932037 | H                        | 4.762571  | -0.580892 | -0.463810 |
| H                                                                                                 | 0.676115  | 5.582840  | -1.945654 | H                        | 0.665020  | -0.594006 | -0.185307 |
| H                                                                                                 | 0.035457  | 1.649846  | -0.983720 | H                        | 3.770159  | -1.608622 | -1.520961 |
| H                                                                                                 | 1.514479  | 3.203410  | -3.175304 |                          |           |           |           |

| 6. The cartesian coordinates of the optimized geometries of the transition states in Path 7 and 8 |           |           |           |                          |           |           |           |
|---------------------------------------------------------------------------------------------------|-----------|-----------|-----------|--------------------------|-----------|-----------|-----------|
| Transition state TS18-19                                                                          |           |           |           | Transition state TS20-21 |           |           |           |
| O                                                                                                 | -1.381323 | 0.408560  | 0.000000  | O                        | -0.914397 | -0.038911 | 0.000000  |
| C                                                                                                 | -2.813084 | 1.420676  | 0.415881  | C                        | 0.048280  | 1.402486  | -0.398940 |
| O                                                                                                 | -3.163496 | 1.008704  | 1.512202  | O                        | 0.247583  | 1.321859  | -1.604643 |
| O                                                                                                 | -2.981230 | 2.199310  | -0.462894 | O                        | 0.191043  | 2.041802  | 0.590905  |
| C                                                                                                 | -1.461539 | -0.535564 | 1.811380  | C                        | -1.050789 | -0.561461 | -1.960342 |
| H                                                                                                 | -2.279393 | -0.720377 | 2.497317  | H                        | -0.388369 | -0.378001 | -2.797583 |
| H                                                                                                 | -0.569536 | -0.044467 | 2.187741  | H                        | -2.092057 | -0.252026 | -2.037477 |
| C                                                                                                 | -1.427489 | -0.960927 | 0.413815  | C                        | -0.644073 | -1.237482 | -0.727551 |
| H                                                                                                 | -0.457697 | -1.413239 | 0.170803  | H                        | -1.378837 | -1.990681 | -0.408897 |
| C                                                                                                 | -2.586326 | -1.776689 | -0.134479 | C                        | 0.770869  | -1.781418 | -0.618316 |
| H                                                                                                 | -2.516802 | -1.824206 | -1.225693 | H                        | 0.981711  | -2.046524 | 0.422224  |
| H                                                                                                 | -2.542810 | -2.800115 | 0.258619  | H                        | 0.874012  | -2.683825 | -1.233629 |
| H                                                                                                 | -3.550376 | -1.336175 | 0.136479  | H                        | 1.506512  | -1.042465 | -0.949146 |
| H                                                                                                 | 1.934206  | 0.551569  | -0.855601 | H                        | -4.218148 | -1.495444 | -0.246926 |
| C                                                                                                 | 2.164648  | 1.050303  | 0.097685  | C                        | -4.536832 | -0.621208 | 0.348766  |
| C                                                                                                 | 2.681046  | 0.016908  | 1.095913  | C                        | -5.016975 | 0.466959  | -0.610567 |
| O                                                                                                 | 1.046218  | 1.763893  | 0.587690  | O                        | -3.529136 | -0.199711 | 1.243279  |
| H                                                                                                 | 2.962352  | 1.781711  | -0.088557 | H                        | -5.380630 | -0.939254 | 0.970886  |
| C                                                                                                 | 4.012107  | -0.588032 | 0.659783  | C                        | -6.299035 | 0.076059  | -1.344144 |
| O                                                                                                 | 1.703773  | -1.025535 | 1.234846  | O                        | -3.942078 | 0.694624  | -1.552785 |
| H                                                                                                 | 2.816847  | 0.510638  | 2.070013  | H                        | -5.172933 | 1.383313  | -0.025090 |
| H                                                                                                 | 0.221997  | 1.332352  | 0.281966  | H                        | -2.695404 | -0.010479 | 0.766017  |
| H                                                                                                 | 3.922237  | -1.010568 | -0.351481 | H                        | -6.159819 | -0.861021 | -1.896692 |
| H                                                                                                 | 4.795735  | 0.181946  | 0.661299  | H                        | -7.128776 | -0.054406 | -0.638772 |
| H                                                                                                 | 2.155071  | -1.755452 | 1.695300  | H                        | -4.033008 | 1.582181  | -1.931713 |
| O                                                                                                 | 4.314904  | -1.622130 | 1.607545  | H                        | -6.589013 | 0.851361  | -2.063234 |
| H                                                                                                 | 5.075963  | -2.136512 | 1.300292  |                          |           |           |           |

| 7. The cartesian coordinates of the optimized geometries of the transition states in Path 9 and 10 |           |           |           |                          |           |           |           |
|----------------------------------------------------------------------------------------------------|-----------|-----------|-----------|--------------------------|-----------|-----------|-----------|
| Transition state TS22-23                                                                           |           |           |           | Transition state TS24-25 |           |           |           |
| O                                                                                                  | -0.680934 | 0.525292  | 0.000000  | O                        | 0.836576  | 0.136187  | 0.000000  |
| C                                                                                                  | -2.188813 | 0.945166  | 0.158501  | C                        | -0.675466 | 0.517103  | 0.143953  |
| O                                                                                                  | -2.857366 | -0.030545 | 0.520434  | O                        | -1.326666 | -0.476826 | 0.492495  |
| O                                                                                                  | -2.346666 | 2.125734  | -0.073018 | O                        | -0.861904 | 1.695347  | -0.081586 |
| C                                                                                                  | -0.921627 | -1.363819 | 0.532039  | C                        | 0.637291  | -1.766642 | 0.491752  |
| H                                                                                                  | -1.840766 | -1.930759 | 0.590670  | H                        | -0.267609 | -2.357740 | 0.529905  |
| H                                                                                                  | -0.310842 | -1.287225 | 1.426044  | H                        | 1.236945  | -1.692731 | 1.393434  |
| C                                                                                                  | -0.418974 | -0.735006 | -0.686446 | C                        | 1.136776  | -1.103778 | -0.709688 |
| H                                                                                                  | 0.668364  | -0.782267 | -0.791503 | H                        | 2.225351  | -1.117767 | -0.808500 |
| C                                                                                                  | -1.122234 | -0.957878 | -2.007942 | C                        | 0.450155  | -1.318157 | -2.041019 |
| H                                                                                                  | -0.774257 | -0.211395 | -2.726671 | H                        | 0.793290  | -0.553660 | -2.742511 |
| H                                                                                                  | -0.861103 | -1.952527 | -2.389003 | H                        | 0.735089  | -2.301384 | -2.434704 |
| H                                                                                                  | -2.208793 | -0.894167 | -1.906229 | H                        | -0.638506 | -1.277755 | -1.949321 |
| H                                                                                                  | -0.993248 | 3.216356  | -2.646305 | H                        | 0.551611  | 2.748932  | -2.677271 |
| C                                                                                                  | -0.121135 | 3.745690  | -2.238369 | C                        | 1.402321  | 3.303548  | -2.256628 |
| C                                                                                                  | 1.168179  | 3.044197  | -2.671640 | C                        | 2.711350  | 2.603010  | -2.635503 |
| O                                                                                                  | -0.162331 | 3.757881  | -0.814864 | O                        | 1.310039  | 3.365416  | -0.836467 |
| H                                                                                                  | -0.133092 | 4.777589  | -2.615997 | H                        | 1.389198  | 4.322321  | -2.669268 |
| C                                                                                                  | 1.263156  | 2.801454  | -4.170493 | C                        | 2.847738  | 2.363151  | -4.131335 |
| O                                                                                                  | 1.247753  | 1.757958  | -2.037144 | O                        | 2.777048  | 1.339246  | -1.961703 |
| H                                                                                                  | 2.029055  | 3.650274  | -2.349850 | H                        | 3.546607  | 3.231358  | -2.285611 |
| H                                                                                                  | -0.969772 | 3.297393  | -0.508270 | H                        | 0.506456  | 2.893339  | -0.538542 |
| H                                                                                                  | 0.393365  | 2.211133  | -4.501909 | H                        | 2.023015  | 1.742838  | -4.503642 |
| H                                                                                                  | 1.258974  | 3.753622  | -4.710818 | H                        | 2.839679  | 3.314315  | -4.677208 |
| H                                                                                                  | 0.971647  | 1.911972  | -1.113041 | H                        | 2.459234  | 1.523981  | -1.056675 |
| O                                                                                                  | 2.475435  | 2.143249  | -4.524160 | H                        | 3.789332  | 1.849377  | -4.352951 |
| H                                                                                                  | 2.588018  | 1.407468  | -3.899539 |                          |           |           |           |



| 8. The cartesian coordinates of the optimized geometries of the transition states in Path 11 |           |           |           |                          |           |           |           |
|----------------------------------------------------------------------------------------------|-----------|-----------|-----------|--------------------------|-----------|-----------|-----------|
| Transition state TS26-27                                                                     |           |           |           | Transition state TS28-29 |           |           |           |
| O                                                                                            | -1.918917 | -0.776739 | 0.595357  | O                        | -0.003975 | 0.765957  | 0.337089  |
| C                                                                                            | -0.889592 | -0.370716 | -0.972441 | C                        | -2.198855 | 1.248707  | 1.147065  |
| H                                                                                            | -1.054307 | -1.335554 | -1.413680 | H                        | -2.273368 | 2.128206  | 0.507496  |
| H                                                                                            | 0.121662  | -0.173603 | -0.637873 | H                        | -2.842072 | 1.358115  | 2.022510  |
| C                                                                                            | -2.007827 | 0.317404  | -0.287774 | C                        | -0.741470 | 0.943995  | 1.501456  |
| H                                                                                            | -1.670512 | 1.250167  | 0.186167  | H                        | -0.426598 | 1.875262  | 2.023690  |
| C                                                                                            | -3.341715 | 0.552944  | -0.980505 | C                        | -0.589596 | -0.210408 | 2.501292  |
| H                                                                                            | -4.089801 | 0.848475  | -0.235714 | H                        | 0.459589  | -0.307666 | 2.800318  |
| H                                                                                            | -3.249878 | 1.349545  | -1.726535 | H                        | -1.185045 | -0.036948 | 3.407487  |
| H                                                                                            | -3.708591 | -0.352909 | -1.476572 | H                        | -0.911587 | -1.155774 | 2.048674  |
| K                                                                                            | -2.621432 | -2.333989 | -3.500073 | K                        | 0.284241  | -0.532831 | -1.839216 |
| I                                                                                            | -0.498320 | 0.398624  | -3.601930 | I                        | -3.166757 | -0.328654 | -0.059283 |
| H                                                                                            | -3.268113 | -4.016842 | 1.414530  | H                        | 4.815912  | -0.531885 | 0.895944  |
| C                                                                                            | -4.135256 | -3.414599 | 1.098847  | C                        | 3.929176  | -0.760767 | 1.512418  |
| C                                                                                            | -4.110159 | -3.267609 | -0.430555 | C                        | 2.738766  | -1.111434 | 0.592274  |
| O                                                                                            | -4.169234 | -2.164972 | 1.762730  | O                        | 3.599373  | 0.350143  | 2.329056  |
| H                                                                                            | -5.047554 | -3.940239 | 1.405066  | H                        | 4.178780  | -1.591034 | 2.183047  |
| C                                                                                            | -4.378781 | -4.580208 | -1.148895 | C                        | 3.180891  | -2.132409 | -0.453935 |
| O                                                                                            | -2.845726 | -2.787837 | -0.883428 | O                        | 2.252466  | 0.057750  | -0.003079 |
| H                                                                                            | -4.902070 | -2.551002 | -0.706394 | H                        | 1.955265  | -1.586247 | 1.212831  |
| H                                                                                            | -3.358610 | -1.647173 | 1.560771  | H                        | 3.144277  | 0.969086  | 1.724996  |
| O                                                                                            | -4.338343 | -4.338714 | -2.577824 | O                        | 2.040465  | -2.535294 | -1.256120 |
| H                                                                                            | -3.614765 | -5.322931 | -0.884546 | H                        | 3.939668  | -1.685630 | -1.110303 |
| H                                                                                            | -5.369486 | -4.959111 | -0.869026 | H                        | 3.606498  | -3.017991 | 0.038607  |
| H                                                                                            | -2.509206 | -2.070395 | -0.255978 | H                        | 1.144745  | 0.408442  | 0.370584  |
| H                                                                                            | -4.710228 | -5.111454 | -3.029278 | H                        | 2.256743  | -3.369544 | -1.697931 |
|                                                                                              |           |           |           | C                        | 1.978549  | 2.576169  | -1.363373 |
|                                                                                              |           |           |           | O                        | 1.536828  | 2.006914  | -2.291434 |
|                                                                                              |           |           |           | O                        | 2.423587  | 3.199896  | -0.486017 |
| Transition state TS29-30                                                                     |           |           |           |                          |           |           |           |
| O                                                                                            | -0.298094 | 2.015164  | 0.869074  |                          |           |           |           |
| C                                                                                            | 1.498942  | 2.160702  | -0.760365 |                          |           |           |           |
| H                                                                                            | 2.497537  | 2.566150  | -0.654695 |                          |           |           |           |
| H                                                                                            | 1.289615  | 1.684614  | -1.708278 |                          |           |           |           |
| C                                                                                            | 0.332752  | 2.869110  | -0.098953 |                          |           |           |           |
| H                                                                                            | 0.732844  | 3.737939  | 0.439483  |                          |           |           |           |
| C                                                                                            | -0.716258 | 3.305421  | -1.116320 |                          |           |           |           |
| H                                                                                            | -1.525524 | 3.845536  | -0.614299 |                          |           |           |           |
| H                                                                                            | -0.269777 | 3.976756  | -1.859186 |                          |           |           |           |
| H                                                                                            | -1.151560 | 2.445491  | -1.635422 |                          |           |           |           |
| K                                                                                            | -0.039315 | -1.755594 | 2.009018  |                          |           |           |           |
| I                                                                                            | 1.976336  | -0.777253 | -0.900890 |                          |           |           |           |
| H                                                                                            | -4.581456 | -0.652073 | -0.380391 |                          |           |           |           |
| C                                                                                            | -3.817478 | -0.110694 | -0.959870 |                          |           |           |           |
| C                                                                                            | -2.424516 | -0.624728 | -0.576535 |                          |           |           |           |
| O                                                                                            | -3.938324 | 1.291864  | -0.759181 |                          |           |           |           |
| H                                                                                            | -4.007964 | -0.280990 | -2.024478 |                          |           |           |           |
| C                                                                                            | -2.329922 | -2.142644 | -0.740577 |                          |           |           |           |
| O                                                                                            | -2.144897 | -0.296861 | 0.790455  |                          |           |           |           |
| H                                                                                            | -1.676509 | -0.143141 | -1.222275 |                          |           |           |           |
| H                                                                                            | -3.849165 | 1.459139  | 0.193604  |                          |           |           |           |
| O                                                                                            | -1.059526 | -2.674815 | -0.365508 |                          |           |           |           |
| H                                                                                            | -3.057857 | -2.631760 | -0.084080 |                          |           |           |           |
| H                                                                                            | -2.571572 | -2.416885 | -1.777481 |                          |           |           |           |
| H                                                                                            | -1.659773 | 0.552357  | 0.833792  |                          |           |           |           |
| H                                                                                            | -0.358586 | -2.279174 | -0.924653 |                          |           |           |           |
| C                                                                                            | 0.664223  | 1.412211  | 1.711350  |                          |           |           |           |
| O                                                                                            | 0.202323  | 0.730123  | 2.637710  |                          |           |           |           |
| O                                                                                            | 1.856573  | 1.618332  | 1.357678  |                          |           |           |           |

9. The cartesian coordinates of the optimized geometries of the transition states in Path 12

| Transition state TS27-31 |           |           |           | Transition state TS32-33 |           |           |           |
|--------------------------|-----------|-----------|-----------|--------------------------|-----------|-----------|-----------|
| O                        | 0.623376  | 2.1 2272  | -0.684947 | O                        | 0.246679  | 1.471882  | 0.363819  |
| C                        | -1.513588 | 1.188559  | -0.991981 | C                        | -2.154981 | 1.223834  | 0.708132  |
| H                        | -0.851774 | 0.593570  | -1.618729 | H                        | -2.300350 | 1.843673  | -0.174894 |
| H                        | -2.239424 | 1.702652  | -1.622553 | H                        | -2.961188 | 1.376937  | 1.428674  |
| C                        | -0.668613 | 2.169874  | -0.120767 | C                        | -0.766544 | 1.447391  | 1.316760  |
| H                        | -1.096107 | 3.167864  | -0.288423 | H                        | -0.891946 | 2.480474  | 1.709498  |
| C                        | -0.643302 | 1.923963  | 1.390572  | C                        | -0.469671 | 0.545082  | 2.523204  |
| H                        | -0.022677 | 2.696588  | 1.856314  | H                        | 0.466077  | 0.859346  | 2.996305  |
| H                        | -1.646353 | 1.971634  | 1.829326  | H                        | -1.274036 | 0.599059  | 3.268306  |
| H                        | -0.198170 | 0.951492  | 1.625963  | H                        | -0.356090 | -0.499332 | 2.212124  |
| K                        | 0.466978  | -2.158667 | 0.173828  | K                        | 0.511712  | -2.477907 | -0.933258 |
| I                        | -2.767844 | -0.352975 | 0.003933  | I                        | -2.601538 | -0.820910 | -0.063383 |
| H                        | 3.731451  | 1.357367  | -1.305376 | H                        | 3.549623  | 1.304740  | -0.468428 |
| C                        | 3.770953  | 1.249898  | -0.208306 | C                        | 3.512776  | 0.937029  | 0.570323  |
| C                        | 3.011663  | -0.035081 | 0.191593  | C                        | 2.876824  | -0.468004 | 0.571847  |
| O                        | 3.270543  | 2.416959  | 0.429177  | O                        | 2.825367  | 1.854439  | 1.404427  |
| H                        | 4.824612  | 1.180438  | 0.092834  | H                        | 4.540247  | 0.887106  | 0.955044  |
| C                        | 3.807672  | -1.249807 | -0.304624 | C                        | 3.796084  | -1.436610 | -0.176069 |
| O                        | 1.705264  | -0.068201 | -0.282805 | O                        | 1.607749  | -0.484696 | -0.019507 |
| H                        | 3.040991  | -0.070517 | 1.304003  | H                        | 2.821089  | -0.802056 | 1.626818  |
| H                        | 2.364326  | 2.588307  | 0.101897  | H                        | 1.903342  | 1.936915  | 1.065442  |
| O                        | 3.128187  | -2.473032 | 0.111215  | O                        | 3.151992  | -2.739052 | -0.284572 |
| H                        | 3.866345  | -1.239134 | -1.401653 | H                        | 3.994881  | -1.061330 | -1.189674 |
| H                        | 4.821577  | -1.252631 | 0.118324  | H                        | 4.747681  | -1.551051 | 0.359094  |
| H                        | 1.069372  | 1.254917  | -0.542963 | H                        | 0.890316  | 0.474548  | 0.216909  |
| H                        | 3.751315  | -3.208652 | 0.019816  | H                        | 3.840407  | -3.404578 | -0.429399 |
|                          |           |           |           | C                        | 0.263725  | 3.240170  | -1.664349 |
|                          |           |           |           | O                        | 1.253763  | 2.802507  | -2.106965 |
|                          |           |           |           | O                        | -0.730595 | 3.746251  | -1.305162 |
| Transition state TS33-34 |           |           |           | Transition state TS34-35 |           |           |           |
| O                        | 0.139831  | 1.639069  | 0.068012  | O                        | 0.498742  | 1.425048  | 0.824260  |
| C                        | -2.280443 | 1.284448  | 0.024437  | C                        | -1.816266 | 1.545255  | 0.494675  |
| H                        | -2.272918 | 1.486019  | -1.044748 | H                        | -1.668137 | 1.412350  | -0.559038 |
| H                        | -3.222472 | 1.608503  | 0.471366  | H                        | -2.750886 | 2.004258  | 0.789966  |
| C                        | -1.059539 | 1.890597  | 0.722807  | C                        | -0.752135 | 1.241580  | 1.524979  |
| H                        | -1.300036 | 2.971514  | 0.623347  | H                        | -0.837536 | 2.042191  | 2.271123  |
| C                        | -0.984700 | 1.567034  | 2.220302  | C                        | -0.714604 | -0.081145 | 2.278099  |
| H                        | -0.190674 | 2.156441  | 2.689757  | H                        | 0.081505  | -0.031941 | 3.029589  |
| H                        | -1.931879 | 1.795801  | 2.726439  | H                        | -1.668639 | -0.247391 | 2.784891  |
| H                        | -0.756781 | 0.506569  | 2.377604  | H                        | -0.538204 | -0.936169 | 1.623106  |
| K                        | 0.609181  | -2.530309 | -0.862730 | K                        | 0.237948  | -0.918935 | -1.434810 |
| I                        | -2.482998 | -0.941395 | 0.107145  | I                        | -3.075574 | -0.888667 | -0.166082 |
| H                        | 3.400715  | 1.427770  | -0.361509 | H                        | 4.682186  | -0.318781 | 1.439419  |
| C                        | 3.352104  | 1.123214  | 0.694399  | C                        | 4.615163  | -1.136771 | 0.703341  |
| C                        | 2.853079  | -0.329827 | 0.772094  | C                        | 3.458915  | -0.864174 | -0.260109 |
| O                        | 2.544471  | 2.010983  | 1.441550  | O                        | 4.462372  | -2.389437 | 1.352173  |
| H                        | 4.361608  | 1.180956  | 1.121772  | H                        | 5.564312  | -1.184432 | 0.159569  |
| C                        | 3.830050  | -1.270078 | 0.073545  | C                        | 3.608924  | 0.457947  | -1.012667 |
| O                        | 1.587048  | -0.497548 | 0.151334  | O                        | 2.210817  | -0.930410 | 0.461780  |
| H                        | 2.777419  | -0.614247 | 1.834251  | H                        | 3.411450  | -1.695267 | -0.976723 |
| H                        | 1.671099  | 2.086134  | 0.985071  | H                        | 3.576202  | -2.397813 | 1.752508  |
| O                        | 3.249000  | -2.600847 | -0.010210 | O                        | 2.449331  | 0.726105  | -1.802132 |
| H                        | 4.037269  | -0.911969 | -0.943735 | H                        | 3.762893  | 1.280686  | -0.301394 |
| H                        | 4.769856  | -1.316882 | 0.637148  | H                        | 4.492515  | 0.402917  | -1.662655 |
| H                        | 1.006350  | 0.338415  | 0.180219  | H                        | 1.968952  | -0.043635 | 0.798066  |
| H                        | 3.968867  | -3.241060 | -0.110706 | H                        | 2.117228  | 1.612613  | -1.516848 |
| C                        | 0.394577  | 2.572870  | -1.680963 | C                        | 0.446934  | 2.640176  | 0.084467  |
| O                        | 1.399061  | 2.066492  | -2.072641 | O                        | 1.464739  | 2.936063  | -0.545767 |
| O                        | -0.535002 | 3.315137  | -1.757151 | O                        | -0.684878 | 3.212923  | 0.154119  |

10. The cartesian coordinates of the optimized geometries of the transition states in Path 13

| Transition state TS36-37 |           |           |           | Transition state TS38-39 |           |           |           |
|--------------------------|-----------|-----------|-----------|--------------------------|-----------|-----------|-----------|
| O                        | 0.784076  | 2.535500  | -0.95685  | O                        | 0.886495  | 1.674326  | 0.368048  |
| C                        | -0.827866 | 1.454874  | -0.657932 | C                        | -1.137585 | 0.928786  | -0.466313 |
| H                        | -0.235644 | 0.655890  | -1.070901 | H                        | -0.474490 | 0.298887  | -1.058437 |
| H                        | -1.381881 | 2.025983  | -1.393328 | H                        | -1.492718 | 1.745587  | -1.094445 |
| C                        | -0.297390 | 2.197613  | 0.517649  | C                        | -0.414962 | 1.456647  | 0.801074  |
| H                        | -0.938800 | 3.065218  | 0.741019  | H                        | -0.888777 | 2.417109  | 1.060877  |
| C                        | 0.018960  | 1.478486  | 1.826308  | C                        | -0.457071 | 0.566166  | 2.051700  |
| H                        | 0.521784  | 2.177595  | 2.505159  | H                        | 0.129341  | 1.056203  | 2.836102  |
| H                        | -0.896789 | 1.118173  | 2.308097  | H                        | -1.474684 | 0.406603  | 2.424590  |
| H                        | 0.703300  | 0.634946  | 1.672048  | H                        | 0.010109  | -0.413267 | 1.872180  |
| K                        | 0.379540  | -1.683891 | 0.094524  | K                        | 0.102107  | -2.380755 | -0.146601 |
| I                        | -2.777853 | -0.319116 | -0.142968 | I                        | -2.965649 | -0.357918 | -0.224754 |
| H                        | 4.462556  | 1.030516  | -1.715436 | H                        | 4.223280  | -0.160687 | -1.804971 |
| C                        | 4.338380  | 1.261332  | -0.650708 | C                        | 4.241030  | 0.107016  | -0.741019 |
| C                        | 3.400261  | 0.250854  | 0.016191  | C                        | 3.247483  | -0.752021 | 0.046105  |
| H                        | 5.325581  | 1.267625  | -0.171031 | H                        | 5.264023  | -0.020713 | -0.362909 |
| C                        | 3.947216  | -1.164098 | -0.116187 | C                        | 3.551762  | -2.239259 | -0.117839 |
| O                        | 2.105642  | 0.271783  | -0.568861 | O                        | 1.910611  | -0.545148 | -0.387226 |
| H                        | 3.323173  | 0.486308  | 1.091589  | H                        | 3.325572  | -0.495003 | 1.118022  |
| O                        | 3.049867  | -2.101680 | 0.531049  | O                        | 2.640596  | -3.088654 | 0.624868  |
| H                        | 4.039593  | -1.429236 | -1.177987 | H                        | 3.421668  | -2.527105 | -1.166595 |
| H                        | 4.935899  | -1.218452 | 0.355269  | H                        | 4.585086  | -2.464186 | 0.173147  |
| H                        | 1.700595  | 1.208886  | -0.489073 | H                        | 1.586390  | 0.400838  | -0.112731 |
| H                        | 3.547972  | -2.902550 | 0.751975  | H                        | 2.925902  | -3.109578 | 1.551544  |
| H                        | 3.913538  | 2.267014  | -0.570010 | H                        | 3.967468  | 1.162834  | -0.651883 |
|                          |           |           |           | C                        | 1.419815  | 3.516918  | -0.149076 |
|                          |           |           |           | O                        | 0.439048  | 4.167406  | 0.037873  |
|                          |           |           |           | O                        | 2.551793  | 3.342193  | -0.472927 |
| Transition state TS39-40 |           |           |           |                          |           |           |           |
| O                        | 0.216177  | 1.859280  | 0.594246  |                          |           |           |           |
| C                        | -1.515698 | 1.384040  | -0.899608 |                          |           |           |           |
| H                        | -0.977551 | 0.532438  | -1.265278 |                          |           |           |           |
| H                        | -2.303405 | 1.756620  | -1.543020 |                          |           |           |           |
| C                        | -1.198384 | 2.080477  | 0.402153  |                          |           |           |           |
| H                        | -1.346062 | 3.149986  | 0.201997  |                          |           |           |           |
| C                        | -1.931676 | 1.751155  | 1.694270  |                          |           |           |           |
| H                        | -1.568908 | 2.423648  | 2.479244  |                          |           |           |           |
| H                        | -3.005963 | 1.904020  | 1.560434  |                          |           |           |           |
| H                        | -1.789995 | 0.713918  | 2.003745  |                          |           |           |           |
| K                        | 0.591332  | -1.083416 | 0.807298  |                          |           |           |           |
| I                        | -2.913041 | -1.024234 | -0.209742 |                          |           |           |           |
| H                        | 4.518019  | -2.733454 | -0.655029 |                          |           |           |           |
| C                        | 4.964825  | -1.765435 | -0.913083 |                          |           |           |           |
| C                        | 4.070363  | -0.623636 | -0.444994 |                          |           |           |           |
| H                        | 5.954295  | -1.706829 | -0.443209 |                          |           |           |           |
| C                        | 3.960519  | -0.586485 | 1.089305  |                          |           |           |           |
| O                        | 2.764568  | -0.775149 | -1.037189 |                          |           |           |           |
| H                        | 4.486430  | 0.332814  | -0.788439 |                          |           |           |           |
| O                        | 2.871697  | 0.203580  | 1.565285  |                          |           |           |           |
| H                        | 3.788930  | -1.600213 | 1.477329  |                          |           |           |           |
| H                        | 4.911629  | -0.231372 | 1.512989  |                          |           |           |           |
| H                        | 2.476534  | 0.131521  | -1.268000 |                          |           |           |           |
| H                        | 2.778605  | 1.014908  | 1.016700  |                          |           |           |           |
| H                        | 5.094378  | -1.728920 | -1.998977 |                          |           |           |           |
| C                        | 0.888231  | 2.101930  | -0.610911 |                          |           |           |           |
| O                        | 0.117563  | 2.375794  | -1.586028 |                          |           |           |           |
| O                        | 2.118727  | 1.943737  | -0.588266 |                          |           |           |           |

11. The cartesian coordinates of the optimized geometries of the transition states in Path 17

| Transition state TS62-63 |           |           |           | Transition state TS64-65 |           |           |           |
|--------------------------|-----------|-----------|-----------|--------------------------|-----------|-----------|-----------|
| O                        | 0.564202  | 0.89 942  | 0.000000  | O                        | -1.108949 | -0.214008 | 0.000000  |
| C                        | 2.326359  | 1.491786  | -0.431494 | C                        | -3.504153 | -0.039992 | -0.275114 |
| H                        | 2.097854  | 2.422198  | -0.933239 | H                        | -4.105767 | 0.672759  | -0.813856 |
| H                        | 2.666807  | 0.662398  | -1.033773 | H                        | -3.766317 | -0.261638 | 0.747690  |
| C                        | 1.649363  | 1.206629  | 0.847361  | C                        | -2.219597 | -0.597872 | -0.867019 |
| H                        | 2.048640  | 0.322533  | 1.363517  | H                        | -2.222670 | -1.685773 | -0.810996 |
| C                        | 1.413314  | 2.350617  | 1.818748  | C                        | -1.960336 | -0.130991 | -2.294626 |
| H                        | 0.653983  | 2.061753  | 2.555119  | H                        | -1.016009 | -0.543834 | -2.662339 |
| H                        | 2.335926  | 2.601705  | 2.354193  | H                        | -2.767079 | -0.477531 | -2.948478 |
| H                        | 1.061623  | 3.244190  | 1.289086  | H                        | -1.913886 | 0.961985  | -2.346196 |
| K                        | -2.306689 | 4.754863  | 0.033399  | K                        | 3.058336  | -0.277987 | -2.689263 |
| I                        | 4.932738  | 2.276486  | -0.054341 | I                        | -5.235596 | -1.920155 | -1.058797 |
| H                        | -2.329662 | -0.255753 | -1.352050 | H                        | 1.705282  | -1.759498 | 2.062342  |
| C                        | -2.511205 | -0.269251 | -0.266130 | C                        | 1.244250  | -2.544609 | 1.446032  |
| C                        | -2.796291 | 1.164122  | 0.209361  | C                        | 1.747450  | -2.418626 | 0.002563  |
| O                        | -1.429350 | -0.891846 | 0.420733  | O                        | -0.179219 | -2.500363 | 1.552314  |
| H                        | -3.389338 | -0.895993 | -0.075857 | H                        | 1.536859  | -3.518133 | 1.851552  |
| C                        | -4.159164 | 1.629673  | -0.284736 | C                        | 3.218807  | -2.796742 | -0.088376 |
| O                        | -1.820886 | 2.100593  | -0.261651 | O                        | 1.619039  | -1.077213 | -0.496828 |
| H                        | -2.803963 | 1.164506  | 1.311252  | H                        | 1.164251  | -3.100902 | -0.633716 |
| H                        | -0.603160 | -0.367818 | 0.261707  | H                        | -0.506197 | -1.635100 | 1.240414  |
| O                        | -4.401726 | 2.958053  | 0.210398  | O                        | 3.639151  | -2.690645 | -1.458353 |
| H                        | -4.181382 | 1.630899  | -1.383262 | H                        | 3.820175  | -2.127036 | 0.541519  |
| H                        | -4.932986 | 0.946109  | 0.085195  | H                        | 3.347097  | -3.826252 | 0.266006  |
| H                        | -0.900383 | 1.748726  | -0.105704 | H                        | 0.695335  | -0.768324 | -0.401070 |
|                          |           |           |           | H                        | 4.534364  | -3.057290 | -1.535951 |
|                          |           |           |           | C                        | -1.254135 | 1.064627  | 0.577130  |
|                          |           |           |           | O                        | -0.270661 | 1.513814  | 1.167399  |

12. The cartesian coordinates of the optimized geometries of the transition states in Path 18

| Transition state TS66-67 |           |           |           | Transition state TS68-69 |           |           |           |
|--------------------------|-----------|-----------|-----------|--------------------------|-----------|-----------|-----------|
| O                        | -1.575876 | 0.194553  | 0.000000  | O                        | -2.276265 | 0.408560  | 0.000000  |
| C                        | 0.070294  | 1.273097  | -0.045751 | C                        | 0.073908  | 0.070882  | 0.292457  |
| H                        | -0.365100 | 2.262372  | -0.106825 | H                        | -0.052396 | -0.326187 | 1.287736  |
| H                        | 0.501801  | 0.869582  | -0.950875 | H                        | 0.933430  | 0.685361  | 0.090751  |
| C                        | -0.525707 | 0.322840  | 0.920188  | C                        | -1.075579 | -0.012314 | -0.703349 |
| H                        | 0.064106  | -0.602115 | 1.020478  | H                        | -0.884101 | 0.724812  | -1.491821 |
| C                        | -0.913733 | 0.853613  | 2.293912  | C                        | -1.413899 | -1.355953 | -1.336658 |
| H                        | -1.573739 | 0.134344  | 2.793907  | H                        | -2.334018 | -1.245739 | -1.920384 |
| H                        | -0.028144 | 1.004581  | 2.921895  | H                        | -0.613324 | -1.675173 | -2.005393 |
| H                        | -1.447564 | 1.807575  | 2.206207  | H                        | -1.560866 | -2.127186 | -0.575026 |
| K                        | -3.331349 | 4.367867  | 0.368687  | K                        | -4.269508 | -3.415294 | 1.520346  |
| I                        | 2.452188  | 2.226809  | 0.746468  | I                        | 1.777727  | -1.986658 | -0.128540 |
| H                        | -5.646532 | -0.148856 | -0.715754 | H                        | -6.641921 | 0.857233  | -0.477256 |
| C                        | -5.208655 | -0.278324 | 0.281724  | C                        | -6.033871 | 0.404810  | -1.269591 |
| C                        | -4.782741 | 1.071706  | 0.866469  | C                        | -5.594217 | -1.006568 | -0.878239 |
| H                        | -5.946117 | -0.772768 | 0.925967  | H                        | -6.621118 | 0.386481  | -2.195361 |
| C                        | -5.969475 | 2.019947  | 0.955326  | C                        | -6.793371 | -1.899500 | -0.601252 |
| O                        | -3.775499 | 1.697989  | 0.069100  | O                        | -4.786008 | -0.999005 | 0.310347  |
| H                        | -4.393027 | 0.917879  | 1.885560  | H                        | -5.015397 | -1.453701 | -1.700637 |
| O                        | -5.550613 | 3.245897  | 1.583203  | O                        | -6.331871 | -3.231624 | -0.316513 |
| H                        | -6.352186 | 2.228861  | -0.053783 | H                        | -7.357829 | -1.505878 | 0.255311  |
| H                        | -6.766557 | 1.550465  | 1.544829  | H                        | -7.446141 | -1.906903 | -1.482274 |
| H                        | -2.941615 | 1.133552  | 0.084308  | H                        | -3.985272 | -0.455817 | 0.156081  |
| H                        | -6.335941 | 3.786613  | 1.762690  | H                        | -7.099590 | -3.822969 | -0.266564 |
|                          |           |           |           | H                        | -5.159822 | 1.043209  | -1.438067 |
|                          |           |           |           | C                        | -2.068436 | 1.518777  | 0.826222  |
|                          |           |           |           | O                        | -3.074760 | 2.049603  | 1.306594  |
